# Supplementary material for: Synergistic promotion of oxygen vacancy and Lewis acidity of Nb2O5 on the preferential hydroxymethyl hydrogenolysis of 5-hydroxymethylfurfural catalyzed by single atom Pt
Source: Royal Society of Chemistry journal article supplement (doi:10.1039/d4cy00559g), 2024-01-01
Supplement: d4cy00559g1.pdf [file d4cy00559g1.pdf]

## Supporting Information

### **Synergistic promotion of oxygen vacancy and Lewis acidity of Nb<sub>2</sub>O<sub>5</sub> on the preferential hydroxymethyl hydrogenolysis of 5-hydroxymethylfurfural catalyzed by single atom Pt**

Ting-Hao Liu,<sup>a</sup> Shuai Fu,<sup>a</sup> Jing-Tao Gou,<sup>a</sup> Yin-Sheng Zhang,<sup>a</sup> Chang-Wei Hu,<sup>b</sup> Hua-Qing Yang<sup>a\*</sup>

<sup>a</sup>*College of Chemical Engineering, Sichuan University, Chengdu, Sichuan, 610065, P.R. China*

<sup>b</sup>*Key Laboratory of Green Chemistry and Technology, Ministry of Education, College of Chemistry, Sichuan University, Chengdu, Sichuan, 610064, P.R. China*

\*Correspondence to:

H.-Q. Yang; e-mail: [huaqingyang@scu.edu.cn](mailto:huaqingyang@scu.edu.cn);

Fax: +86-28-85464466

Telephone: +86-28-85464466

## Catalog

|                                                                                                                                                                                                                                                                                                                                                                                                                                                                                                                                                                     |    |
|---------------------------------------------------------------------------------------------------------------------------------------------------------------------------------------------------------------------------------------------------------------------------------------------------------------------------------------------------------------------------------------------------------------------------------------------------------------------------------------------------------------------------------------------------------------------|----|
| Evaluation of rate constants: .....                                                                                                                                                                                                                                                                                                                                                                                                                                                                                                                                 | 5  |
| The equations for calculating TOF according to the energetic span model: .....                                                                                                                                                                                                                                                                                                                                                                                                                                                                                      | 6  |
| The relative Gibbs free energies of two oxygen defective Nb <sub>2</sub> O <sub>5</sub> (010) models are computed by the following equation, eq(S1): .....                                                                                                                                                                                                                                                                                                                                                                                                          | 7  |
| Description of the calculation method for the stability of Pt <sub>1</sub> /Nb <sub>2</sub> O <sub>5</sub> -Ov1 and Pt <sub>1</sub> /Nb <sub>2</sub> O <sub>5</sub> -Ov2:.....                                                                                                                                                                                                                                                                                                                                                                                      | 7  |
| The relative Gibbs free energies of H <sub>2</sub> adsorption over Pt <sub>1</sub> /Nb <sub>2</sub> O <sub>5</sub> -Ovx are computed by the following equation, eq(S3): .....                                                                                                                                                                                                                                                                                                                                                                                       | 7  |
| <b>Fig. S1.</b> Pt <sub>1</sub> /Nb <sub>2</sub> O <sub>5</sub> model; atoms shown in red, blue, and orange represent O, Nb, and Pt atoms, respectively. ....                                                                                                                                                                                                                                                                                                                                                                                                       | 8  |
| <b>Fig. S2.</b> Nb <sub>2</sub> O <sub>5</sub> (010) model; atoms shown in red and blue represent O and Nb atoms, respectively, (a) Top view. (b) Side view. (c) and (d) two different O vacancies Nb <sub>2</sub> O <sub>5</sub> (010) models on Nb <sub>2</sub> O <sub>5</sub> (010) named Nb <sub>2</sub> O <sub>5</sub> -Ov1 and Nb <sub>2</sub> O <sub>5</sub> -Ov2, respectively. The dotted circles label the missing oxygens (vacancies). ....                                                                                                              | 9  |
| <b>Fig. S3.</b> (a) Pt <sub>1</sub> /Nb <sub>2</sub> O <sub>5</sub> -Ov1 and (b) Pt <sub>1</sub> /Nb <sub>2</sub> O <sub>5</sub> -Ov2 are the two types of oxygen defective Nb <sub>2</sub> O <sub>5</sub> (010) model supported platinum single-atom catalysts, respectively. Bond lengths are reported in Å. Hirshfeld charge of Pt atom is shown in orange. The relative Gibbs free energies ( $G_r$ , kJ mol <sup>-1</sup> ) shown in brackets. ....                                                                                                            | 10 |
| <b>Fig. S4.</b> (a) H <sub>2</sub> -Pt <sub>1</sub> /Nb <sub>2</sub> O <sub>5</sub> -Ov1 (1-v-IM1) and (b) H <sub>2</sub> -Pt <sub>1</sub> /Nb <sub>2</sub> O <sub>5</sub> -Ov2 are the optimized geometric structures of H <sub>2</sub> adsorption over Pt <sub>1</sub> /Nb <sub>2</sub> O <sub>5</sub> -Ov1 and Pt <sub>1</sub> /Nb <sub>2</sub> O <sub>5</sub> -Ov2, respectively, Bond lengths are reported in Å. Hirshfeld charge of Pt atom is shown in orange. The relative Gibbs free energies ( $G_r$ , kJ mol <sup>-1</sup> ) are shown in brackets. .... | 11 |
| <b>Fig. S5.</b> The adsorption modes for HMF, DHMF, and 5-MFA over Nb-site of Pt <sub>1</sub> /Nb <sub>2</sub> O <sub>5</sub> -OV (upper row) and over Pt-site of Pt <sub>1</sub> /Nb <sub>2</sub> O <sub>5</sub> -OV (bottom row), respectively, Bond lengths are reported in Å. The relative Gibbs free energies ( $G_r$ , kJ mol <sup>-1</sup> ) are shown. ....                                                                                                                                                                                                 | 12 |
| <b>Fig. S6.</b> The geometric structures and the relative Gibbs free energy ( $G_r$ , kJ mol <sup>-1</sup> ) relative to HMF-2 for eighth conformers of HMF in THF solution at the G4 level. For clarity, hydrogen atoms on carbon are not shown. Bond lengths are reported in Å.....                                                                                                                                                                                                                                                                               | 13 |
| <b>Fig. S7.</b> The optimized geometric structures (a) and the schematic energy diagrams (b) with the Gibbs free energy ( $G_r$ , kJ mol <sup>-1</sup> ) relative to the reactants for catalytical hydrogenolysis of HMF to 5-MF over [OPtNb]. Bond lengths are reported in Å. ....                                                                                                                                                                                                                                                                                 | 14 |
| <b>Fig. S8.</b> The optimized geometric structures (a) and the schematic energy diagrams (b) with the Gibbs free energy ( $G_r$ , kJ mol <sup>-1</sup> ) relative to the reactants for catalytical hydrogenolysis of DHMF to 5-MFA over [OPtNb]. Bond lengths are reported in Å. ....                                                                                                                                                                                                                                                                               | 15 |
| <b>Fig. S9.</b> The optimized geometric structures (a) and the schematic energy diagrams (b) with the Gibbs free energy ( $G_r$ , kJ mol <sup>-1</sup> ) relative to the reactants for catalytical hydrogenolysis of 5-MFA to DMF over [OPtNb]. Bond lengths are reported in Å. ....                                                                                                                                                                                                                                                                                | 16 |
| <b>Fig. S10.</b> The optimized geometric structures (a) and the schematic energy diagrams (b) with the Gibbs free energy ( $G_r$ , kJ mol <sup>-1</sup> ) relative to the reactants for catalytical hydrogenolysis of HMF to DHMF over [OPtNb]. Bond lengths are reported in Å.....                                                                                                                                                                                                                                                                                 | 17 |
| <b>Fig. S11.</b> The optimized geometric structures (a) and the schematic energy diagrams (b) with the Gibbs free energy ( $G_r$ , kJ mol <sup>-1</sup> ) relative to the reactants for catalytical hydrogenation of 5-MF to MFA over [OPtNb]. Bond lengths are reported in Å.....                                                                                                                                                                                                                                                                                  | 18 |

|                                                                                                                                                                                                                                                                                                                                                                                                                                                                                                                                                                        |    |
|------------------------------------------------------------------------------------------------------------------------------------------------------------------------------------------------------------------------------------------------------------------------------------------------------------------------------------------------------------------------------------------------------------------------------------------------------------------------------------------------------------------------------------------------------------------------|----|
| <b>Fig. S12.</b> The optimized geometric structures (a) and the schematic energy diagrams (b) with the Gibbs free energy ( $G_r$ , kJ mol <sup>-1</sup> ) relative to the reactants for catalytical hydrogenolysis of HMF to 5-MF over [OPTNb-Ov]. Bond lengths are reported in Å.....                                                                                                                                                                                                                                                                                 | 19 |
| <b>Fig. S13.</b> The optimized geometric structures (a) and the schematic energy diagrams (b) with the Gibbs free energy ( $G_r$ , kJ mol <sup>-1</sup> ) relative to the reactants for catalytical hydrogenolysis of DHMF to 5-MFA over [OPTNb-Ov]. Bond lengths are reported in Å.....                                                                                                                                                                                                                                                                               | 20 |
| <b>Fig. S14.</b> The optimized geometric structures (a) and the schematic energy diagrams (b) with the Gibbs free energy ( $G_r$ , kJ mol <sup>-1</sup> ) relative to the reactants for catalytical hydrogenolysis of 5-MFA to DMF over [OPTNb-Ov]. Bond lengths are reported in Å.....                                                                                                                                                                                                                                                                                | 21 |
| <b>Fig. S15.</b> Arrhenius plots of rate constants for the crucial reaction step of 1-o-IM2 → 1-o-TS1 in the reaction of HMF-to-5-MF hydrogenolysis catalyzed by Pt <sub>1</sub> /Nb <sub>2</sub> O <sub>5</sub> in THF solution.....                                                                                                                                                                                                                                                                                                                                  | 22 |
| <b>Fig. S16.</b> Arrhenius plots of rate constants for the crucial reaction step of 3-o-IM4 → 3-o-TS1(before) in the reaction of HMF-to-DHMF hydrogenation catalyzed by Pt <sub>1</sub> /Nb <sub>2</sub> O <sub>5</sub> in THF solution.....                                                                                                                                                                                                                                                                                                                           | 23 |
| <b>Fig. S17.</b> Arrhenius plots of rate constants for the crucial reaction step of 1-o-IM6 + H <sub>2</sub> + 5-MF → 4-o-TS1 + H <sub>2</sub> O in the reaction of HMF-to-DMF hydrogenation catalyzed by Pt <sub>1</sub> /Nb <sub>2</sub> O <sub>5</sub> in THF solution.....                                                                                                                                                                                                                                                                                         | 24 |
| <b>Fig. S18.</b> Arrhenius plots of rate constants for the crucial reaction step of 1-v-IM4 → 1-v-TS1 (before) in the reaction of HMF-to-5-MF hydrogenolysis catalyzed by Pt <sub>1</sub> /Nb <sub>2</sub> O <sub>5</sub> -Ov in THF solution.....                                                                                                                                                                                                                                                                                                                     | 25 |
| <b>Fig. S19.</b> Arrhenius plots of rate constants for the crucial reaction step of 3-v-IM2 → 3-v-TS1 in the reaction of HMF-to-DHMF hydrogenation catalyzed by Pt <sub>1</sub> /Nb <sub>2</sub> O <sub>5</sub> -Ov in THF solution.....                                                                                                                                                                                                                                                                                                                               | 26 |
| <b>Fig. S20.</b> Arrhenius plots of rate constants for the crucial reaction step of 1-v-IM4 + H <sub>2</sub> → 4-v-TS1 + H <sub>2</sub> O in the reaction of HMF-to-DMF hydrogenation catalyzed by Pt <sub>1</sub> /Nb <sub>2</sub> O <sub>5</sub> -Ov in THF solution.....                                                                                                                                                                                                                                                                                            | 27 |
| <b>Table S1.</b> Over the 325 ~ 525 K temperature range, the rate constant ratios of $k_{v-OH-1}/k_{v-CHO-1}$ , $k_{v-OH-1}/k_{v-6/7}$ , $k_{o-OH-1}/k_{o-CHO-1}$ , $k_{v-OH-1}/k_{o-OH-1}$ , and $k_{v-CHO-1}/k_{o-CHO-1}$ , as a function of temperature $T$ .....                                                                                                                                                                                                                                                                                                   | 28 |
| <b>Table S2.</b> Zero-point vibrational energies (ZPVE, hartree), sum of electronic energies in the gas phase ( $E_t$ , g, hartree), thermal correction to Gibbs free energies ( $G_0$ , hartree), sum of electronic energies in in aqueous solution ( $E_{t, l}$ , hartree), sum of electronic and thermal Gibbs free energies ( $G_c$ , hartree) and relative Gibbs free energies ( $G_{r, l}$ , kJ mol <sup>-1</sup> ) of various species with respect to the reactants for the reaction of HMF-to-5-MF over Pt <sub>1</sub> /N <sub>2</sub> O <sub>5</sub> .....   | 29 |
| <b>Table S3.</b> Zero-point vibrational energies (ZPVE, hartree), sum of electronic energies in the gas phase ( $E_t$ , g, hartree), thermal correction to Gibbs free energies ( $G_0$ , hartree), sum of electronic energies in in aqueous solution ( $E_{t, l}$ , hartree), sum of electronic and thermal Gibbs free energies ( $G_c$ , hartree) and relative Gibbs free energies ( $G_{r, l}$ , kJ mol <sup>-1</sup> ) of various species with respect to the reactants for the reaction of DHMF-to-5-MFA over Pt <sub>1</sub> /N <sub>2</sub> O <sub>5</sub> ..... | 30 |
| <b>Table S4.</b> Zero-point vibrational energies (ZPVE, hartree), sum of electronic energies in the gas phase ( $E_t$ , g, hartree), thermal correction to Gibbs free energies ( $G_0$ , hartree), sum of electronic energies in in aqueous solution ( $E_{t, l}$ , hartree), sum of electronic and thermal Gibbs free energies ( $G_c$ , hartree) and relative Gibbs free energies ( $G_{r, l}$ , kJ mol <sup>-1</sup> ) of various species with respect to the reactants for the reaction of 5-MFA-to-DMF over Pt <sub>1</sub> /N <sub>2</sub> O <sub>5</sub> .....  | 31 |
| <b>Table S5.</b> Zero-point vibrational energies (ZPVE, hartree), sum of electronic energies in the gas phase ( $E_t$ , g, hartree), thermal correction to Gibbs free energies ( $G_0$ , hartree), sum of electronic                                                                                                                                                                                                                                                                                                                                                   |    |

energies in in aqueous solution ( $E_{t, l}$ , hartree), sum of electronic and thermal Gibbs free energies ( $G_c$ , hartree) and relative Gibbs free energies ( $G_{r, l}$ , kJ mol<sup>-1</sup>) of various species with respect to the reactants for the reaction of HMF-to-DHMF over Pt<sub>1</sub>/N<sub>2</sub>O<sub>5</sub>. .....32

**Table S6.** Zero-point vibrational energies (*ZPVE*, hartree), sum of electronic energies in the gas phase ( $E_{t, g}$ , hartree), thermal correction to Gibbs free energies ( $G_0$ , hartree), sum of electronic energies in in aqueous solution ( $E_{t, l}$ , hartree), sum of electronic and thermal Gibbs free energies ( $G_c$ , hartree) and relative Gibbs free energies ( $G_{r, l}$ , kJ mol<sup>-1</sup>) of various species with respect to the reactants for the reaction of 5-MF-to-5-MFA over Pt<sub>1</sub>/N<sub>2</sub>O<sub>5</sub>. .....33

**Table S7.** Zero-point vibrational energies (*ZPVE*, hartree), sum of electronic energies in the gas phase ( $E_{t, g}$ , hartree), thermal correction to Gibbs free energies ( $G_0$ , hartree), sum of electronic energies in in aqueous solution ( $E_{t, l}$ , hartree), sum of electronic and thermal Gibbs free energies ( $G_c$ , hartree) and relative Gibbs free energies ( $G_{r, l}$ , kJ mol<sup>-1</sup>) of various species with respect to the reactants for the reaction of HMF-to-5-MF over Pt<sub>1</sub>/N<sub>2</sub>O<sub>5</sub>-Ov. ....34

**Table S8.** Zero-point vibrational energies (*ZPVE*, hartree), sum of electronic energies in the gas phase ( $E_{t, g}$ , hartree), thermal correction to Gibbs free energies ( $G_0$ , hartree), sum of electronic energies in in aqueous solution ( $E_{t, l}$ , hartree), sum of electronic and thermal Gibbs free energies ( $G_c$ , hartree) and relative Gibbs free energies ( $G_{r, l}$ , kJ mol<sup>-1</sup>) of various species with respect to the reactants for the reaction of DHMF-to-5-MFA over Pt<sub>1</sub>/N<sub>2</sub>O<sub>5</sub>-Ov.....35

**Table S9.** Zero-point vibrational energies (*ZPVE*, hartree), sum of electronic energies in the gas phase ( $E_{t, g}$ , hartree), thermal correction to Gibbs free energies ( $G_0$ , hartree), sum of electronic energies in in aqueous solution ( $E_{t, l}$ , hartree), sum of electronic and thermal Gibbs free energies ( $G_c$ , hartree) and relative Gibbs free energies ( $G_{r, l}$ , kJ mol<sup>-1</sup>) of various species with respect to the reactants for the reaction of 5-MFA-to-DMF over Pt<sub>1</sub>/N<sub>2</sub>O<sub>5</sub>-Ov.....36

**Table S10.** Zero-point vibrational energies (*ZPVE*, hartree), sum of electronic energies in the gas phase ( $E_{t, g}$ , hartree), thermal correction to Gibbs free energies ( $G_0$ , hartree), sum of electronic energies in in aqueous solution ( $E_{t, l}$ , hartree), sum of electronic and thermal Gibbs free energies ( $G_c$ , hartree) and relative Gibbs free energies ( $G_{r, l}$ , kJ mol<sup>-1</sup>) of various species with respect to the reactants for the reaction of HMF-to-DHMF over Pt<sub>1</sub>/N<sub>2</sub>O<sub>5</sub>-Ov.....37

**Table S11.** Zero-point vibrational energies (*ZPVE*, hartree), sum of electronic energies in the gas phase ( $E_{t, g}$ , hartree), thermal correction to Gibbs free energies ( $G_0$ , hartree), sum of electronic energies in in aqueous solution ( $E_{t, l}$ , hartree), sum of electronic and thermal Gibbs free energies ( $G_c$ , hartree) and relative Gibbs free energies ( $G_{r, l}$ , kJ mol<sup>-1</sup>) of various species with respect to the reactants for the reaction of 5-MF-to-5-MFA over Pt<sub>1</sub>/N<sub>2</sub>O<sub>5</sub>-Ov. ....38

### Evaluation of rate constants:

The rate constants  $k(T)$  was evaluated according to conventional transition state theory  $k'(T)$ , including the tunneling correction  $\kappa(T)$  based on Wigner's formulation as follows:<sup>1</sup>

$$k'(T) = \frac{k_B T}{hc^0} \cdot e^{-\frac{\Delta G^\ddagger}{RT}} \quad (\text{i})$$

$$\kappa(T) = 1 + \frac{1}{24} \left| \frac{\omega^\ddagger h}{k_B T} \right|^2 \quad (\text{ii})$$

$$k(T) = \kappa(T) \times k'(T) \quad (\text{iii})$$

$$\ln k(T) = -\frac{E_a}{RT} + \ln A \quad (\text{iv})$$

$$k(T) = A \cdot e^{-\frac{E_a}{RT}} \quad (\text{v})$$

where  $k_B$  is Boltzmann's constant,  $T$  is the absolute temperature,  $h$  is Planck's constant,  $c^0$  is the standard concentration ( $1 \text{ mol dm}^{-3}$ ),  $\Delta G^\ddagger$  is the activation Gibbs free energy barrier and  $\omega^\ddagger$  is the imaginary frequency of the TS,  $A$  is preexponential factor.

### References:

1. E. Wigner, *J. Chem. Phys.* **1937**, *5*, 720-723.

### The equations for calculating TOF according to the energetic span model:

The efficiency of catalyst can be determined by the turnover frequency (TOF) of the catalytic cycle. Based on the transition state theory (TST), the TOF can be calculated by Eqs. (i) and (ii) proposed by Kozuch et al., in which  $\delta E$  (the energetic span) is defined as the energy difference between the summit and trough of the catalytic cycle.<sup>2-7</sup>

$$\text{TOF} = \frac{k_B T}{h} e^{-\delta E/RT}$$

$$\delta E = \begin{cases} G_{\text{TDTs}} - G_{\text{TDI}} & \text{if TDTs appears after TDI} \\ G_{\text{TDTs}} - G_{\text{TDI}} + \Delta G_r & \text{if TDTs appears before TDI} \end{cases}$$

where  $k_B$  is the Boltzmann constant,  $T$  is the absolute temperature, and  $h$  is the Planck constant.  $G_{\text{TDTs}}$  and  $G_{\text{TDI}}$  are the Gibbs free energies of the TOF determining transition state (TDTs) and the TOF determining intermediate (TDI), and  $\Delta G_r$  is the global free energy of the whole cycle.

#### References:

2. C. Amatore and A. Jutand, *J. Organomet. Chem.*, 1999, **576**, 254-278.
3. S. Kozuch and S. Shaik, *J. Am. Chem. Soc.*, 2006, **128**, 3355-3365.
4. S. Kozuch and S. Shaik, *J. Phys. Chem. A*, 2008, **112**, 6032-6041.
5. S. Kozuch and S. Shaik, *Acc. Chem. Res.*, 2011, **44**, 101-110.
6. A. Uhe, S. Kozuch and S. Shaik, *J. Comput. Chem.*, 2011, **32**, 978-985.
7. S. Kozuch, *ACS Catal.*, 2015, **5**, 5242-5255.

**The relative Gibbs free energies of two oxygen defective Nb<sub>2</sub>O<sub>5</sub> (010) models are computed by the following equation, eq(S1):**

$$G_r = G_{\text{Nb}_2\text{O}_5\text{-ovx}} + \frac{1}{2}G_{\text{O}_2} - G_{\text{Nb}_2\text{O}_5} \dots\dots\dots\text{eq(S1)}$$

$G_r$  is the relative Gibbs free energy of the formation of oxygen vacancies on Nb<sub>2</sub>O<sub>5</sub> (010),  $G_{\text{Nb}_2\text{O}_5\text{-ovx}}$ ,  $G_{\text{Nb}_2\text{O}_5}$  and  $G_{\text{O}_2}$  are the Gibbs free energies of Nb<sub>2</sub>O<sub>5</sub> (010) with oxygen vacancies, Nb<sub>2</sub>O<sub>5</sub> (010) and the ground-state Oxygen molecule, respectively,  $x$  is equal to 1 and 2.

**Description of the calculation method for the stability of Pt<sub>1</sub>/Nb<sub>2</sub>O<sub>5</sub>-Ov1 and Pt<sub>1</sub>/Nb<sub>2</sub>O<sub>5</sub>-Ov2:**

Two types of oxygen defective Nb<sub>2</sub>O<sub>5</sub> (010) model supported platinum catalyser models were built in this work, which are named Pt<sub>1</sub>/Nb<sub>2</sub>O<sub>5</sub>-Ov1 and Pt<sub>1</sub>/Nb<sub>2</sub>O<sub>5</sub>-Ov2, respectively. First, one O1 or one O2 atom was removed from the Nb<sub>2</sub>O<sub>5</sub> (010) model to obtain Nb<sub>2</sub>O<sub>5</sub>-Ov1 and Nb<sub>2</sub>O<sub>5</sub>-Ov2, respectively. Then, a platinum atom was placed at the surface of oxygen defective Nb<sub>2</sub>O<sub>5</sub> (010) model, coordinating with an oxygen atom and a niobium atom, as shown in Fig. S3.

The relative Gibbs free energies of Pt<sub>1</sub>/Nb<sub>2</sub>O<sub>5</sub>-Ov1 and Pt<sub>1</sub>/Nb<sub>2</sub>O<sub>5</sub>-Ov2 models ( $G_r$ ) are computed by the following reaction equation, eq(S2):

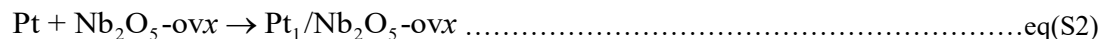

**The relative Gibbs free energies of H<sub>2</sub> adsorption over Pt<sub>1</sub>/Nb<sub>2</sub>O<sub>5</sub>-Ovx are computed by the following equation, eq(S3):**

$$G_r = G_{\text{H}_2\text{-Pt}_1/\text{Nb}_2\text{O}_5\text{-Ovx}} - G_{\text{H}_2} - G_{\text{Pt}_1/\text{Nb}_2\text{O}_5\text{-Ovx}} \dots\dots\dots\text{eq(S3)}$$

In eq(S2), the structures and energies of ground-state Pt metal atom, Nb<sub>2</sub>O<sub>5</sub>-Ovx and Pt<sub>1</sub>/Nb<sub>2</sub>O<sub>5</sub>-Ovx are calculated,  $x$  = the type of O atoms in the outermost atomic layer of Nb<sub>2</sub>O<sub>5</sub> (010),  $x$  is equal to 1 and 2. In eq(S3),  $G_r$  is the relative Gibbs free energy of H<sub>2</sub> adsorption on Pt<sub>1</sub>/Nb<sub>2</sub>O<sub>5</sub>-Ovx,  $G_{\text{H}_2\text{-Pt}_1/\text{Nb}_2\text{O}_5\text{-Ovx}}$ ,  $G_{\text{H}_2}$  and  $G_{\text{Pt}_1/\text{Nb}_2\text{O}_5\text{-Ovx}}$  are the Gibbs free energies of H<sub>2</sub>-Pt<sub>1</sub>/Nb<sub>2</sub>O<sub>5</sub>-Ovx, H<sub>2</sub> and Pt<sub>1</sub>/Nb<sub>2</sub>O<sub>5</sub>-Ovx, respectively.

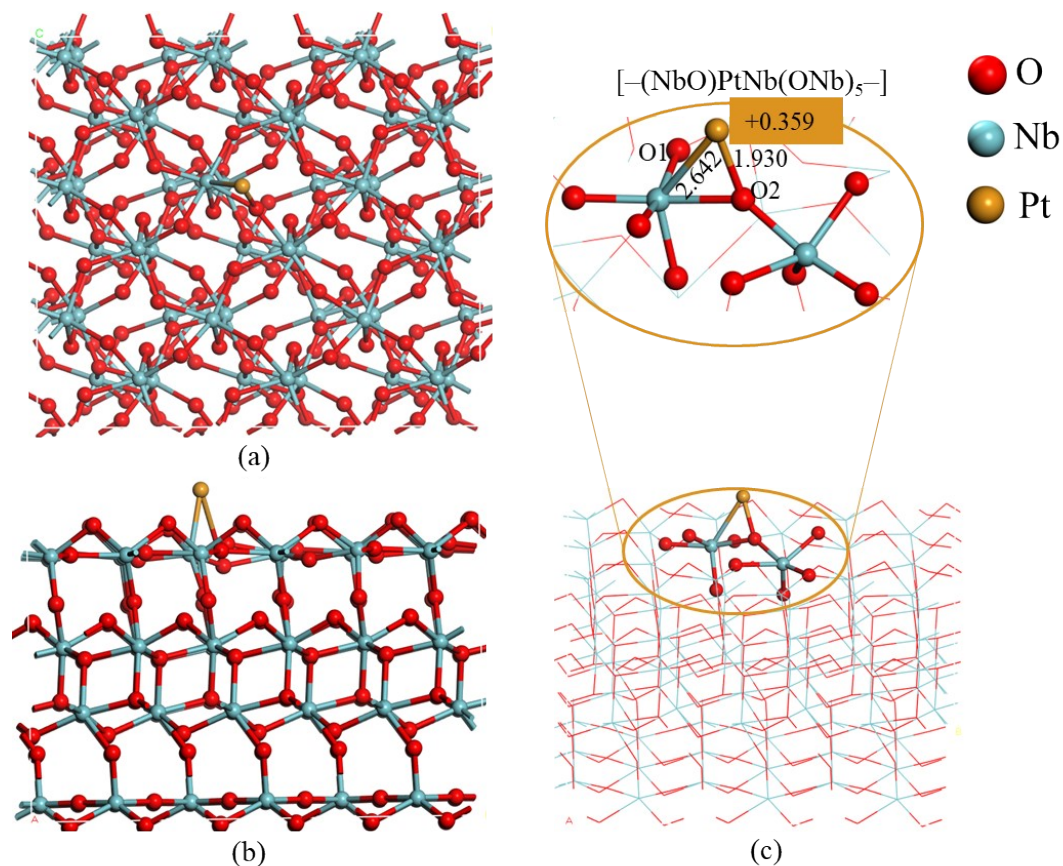

**Fig. S1.**  $\text{Pt}_1/\text{Nb}_2\text{O}_5$  model; atoms shown in red, blue, and orange represent O, Nb, and Pt atoms, respectively. (a) Top view. (b) Side view. (c)  $\text{Pt}_1/\text{Nb}_2\text{O}_5(010)$  surface QM/MM model. Spherical atoms are QM atoms, others are MM atoms. On  $\text{Nb}_2\text{O}_5(010)$  surface, there is only one kind of catalytically active site, i.e.,  $[-(\text{NbO})_5\text{Nb}]$ , denoted as  $[\text{Nb}]$ . Then, the Pt-containing active site was constructed by placing a platinum atom on  $[\text{Nb}]$  active site, resulting in Pt-supported  $\text{Nb}_2\text{O}_5(010)$  model ( $\text{Pt}_1/\text{Nb}_2\text{O}_5$ ) including  $\text{O}180\text{Nb}72\text{Pt}1$ . On  $\text{Pt}_1/\text{Nb}_2\text{O}_5$ , there is only a type of Pt-containing catalytically active site i.e.,  $[-(\text{NbO})\text{PtNb}(\text{ONb})_5-]$  ( $[\text{OPtNb}]$ ). Hirshfeld charge of Pt atom is shown in orange. The Mayer bond orders of Pt–Nb (0.726), being symbolic of semi-single-bond, and Pt–O2 (0.972), being typical of single-bond.



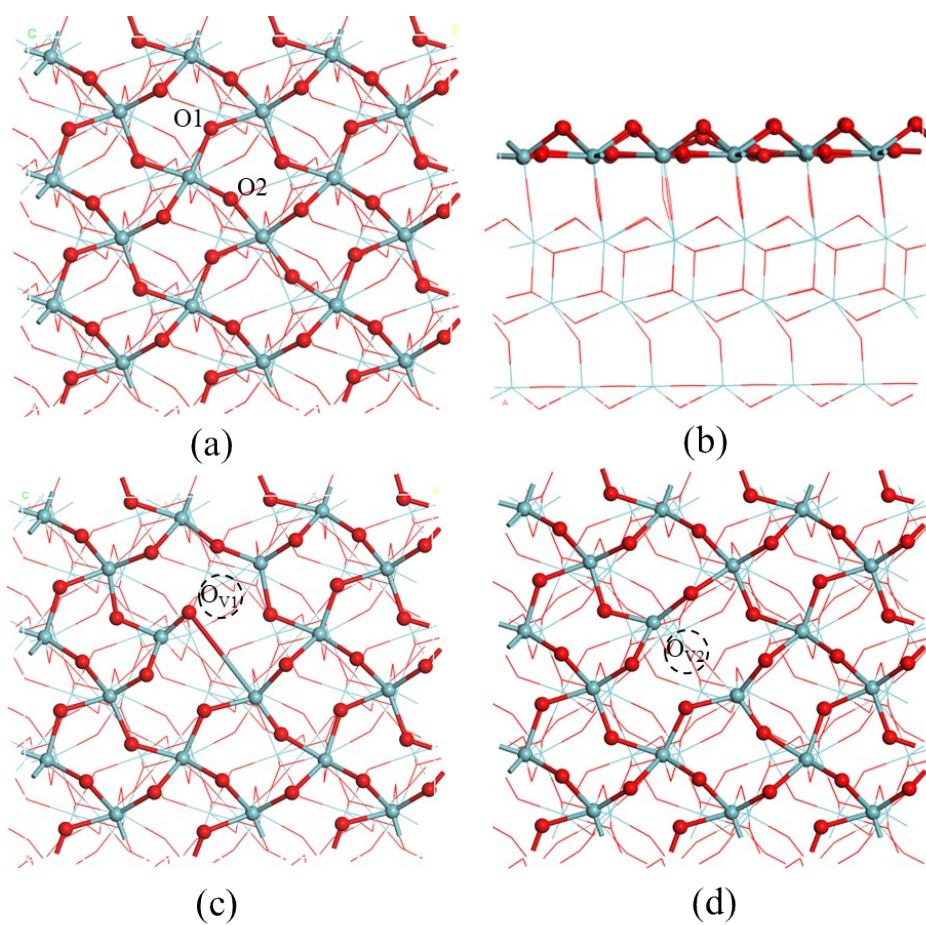

**Fig. S2.** Nb<sub>2</sub>O<sub>5</sub>(010) model; atoms shown in red and blue represent O and Nb atoms, respectively, (a) Top view. (b) Side view. (c) and (d) two different O vacancies Nb<sub>2</sub>O<sub>5</sub>(010) models on Nb<sub>2</sub>O<sub>5</sub>(010) named Nb<sub>2</sub>O<sub>5</sub>-Ov1 and Nb<sub>2</sub>O<sub>5</sub>-Ov2, respectively. The dotted circles label the missing oxygens (vacancies).

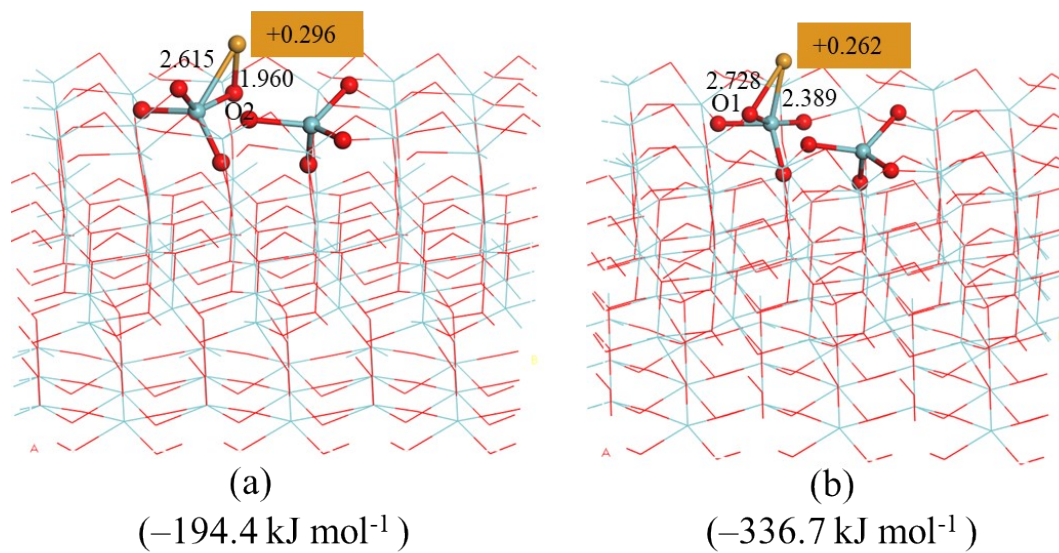

**Fig. S3.** (a) Pt<sub>1</sub>/Nb<sub>2</sub>O<sub>5</sub>-Ov1 and (b) Pt<sub>1</sub>/Nb<sub>2</sub>O<sub>5</sub>-Ov2 are the two types of oxygen defective Nb<sub>2</sub>O<sub>5</sub>(010) model supported platinum single-atom catalysts, respectively. Bond lengths are reported in Å. Hirshfeld charge of Pt atom is shown in orange. The relative Gibbs free energies ( $G_r$ , kJ mol<sup>-1</sup>) shown in brackets.

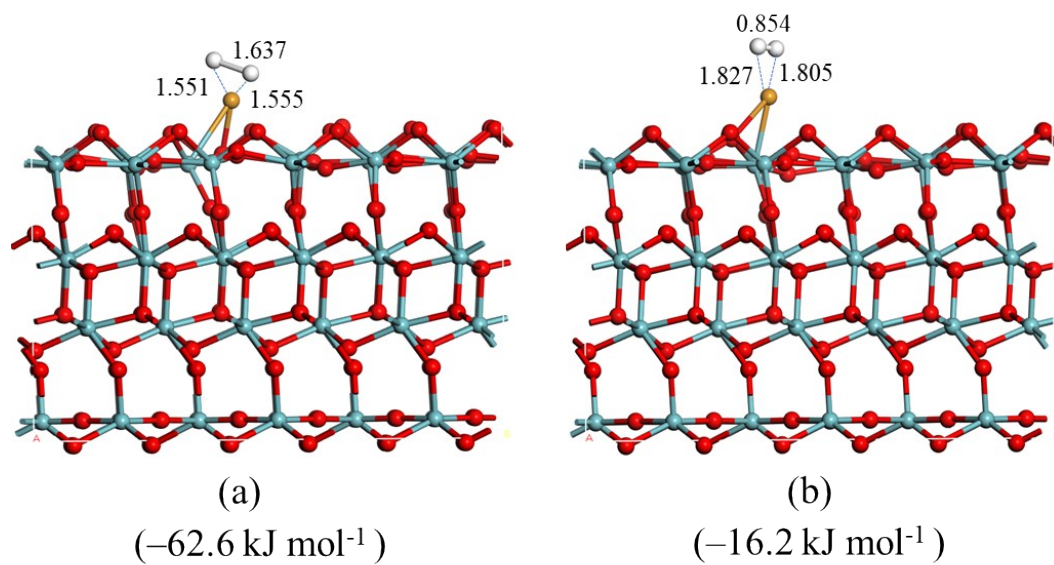

**Fig. S4.** (a)  $\text{H}_2\text{-Pt}_1/\text{Nb}_2\text{O}_5\text{-Ov1}$  (1-v-IM1) and (b)  $\text{H}_2\text{-Pt}_1/\text{Nb}_2\text{O}_5\text{-Ov2}$  are the optimized geometric structures of  $\text{H}_2$  adsorption over  $\text{Pt}_1/\text{Nb}_2\text{O}_5\text{-Ov1}$  and  $\text{Pt}_1/\text{Nb}_2\text{O}_5\text{-Ov2}$ , respectively, Bond lengths are reported in Å. Hirshfeld charge of Pt atom is shown in orange. The relative Gibbs free energies ( $G_r$ ,  $\text{kJ mol}^{-1}$ ) to the dissociated reactant and catalyst are shown in brackets.

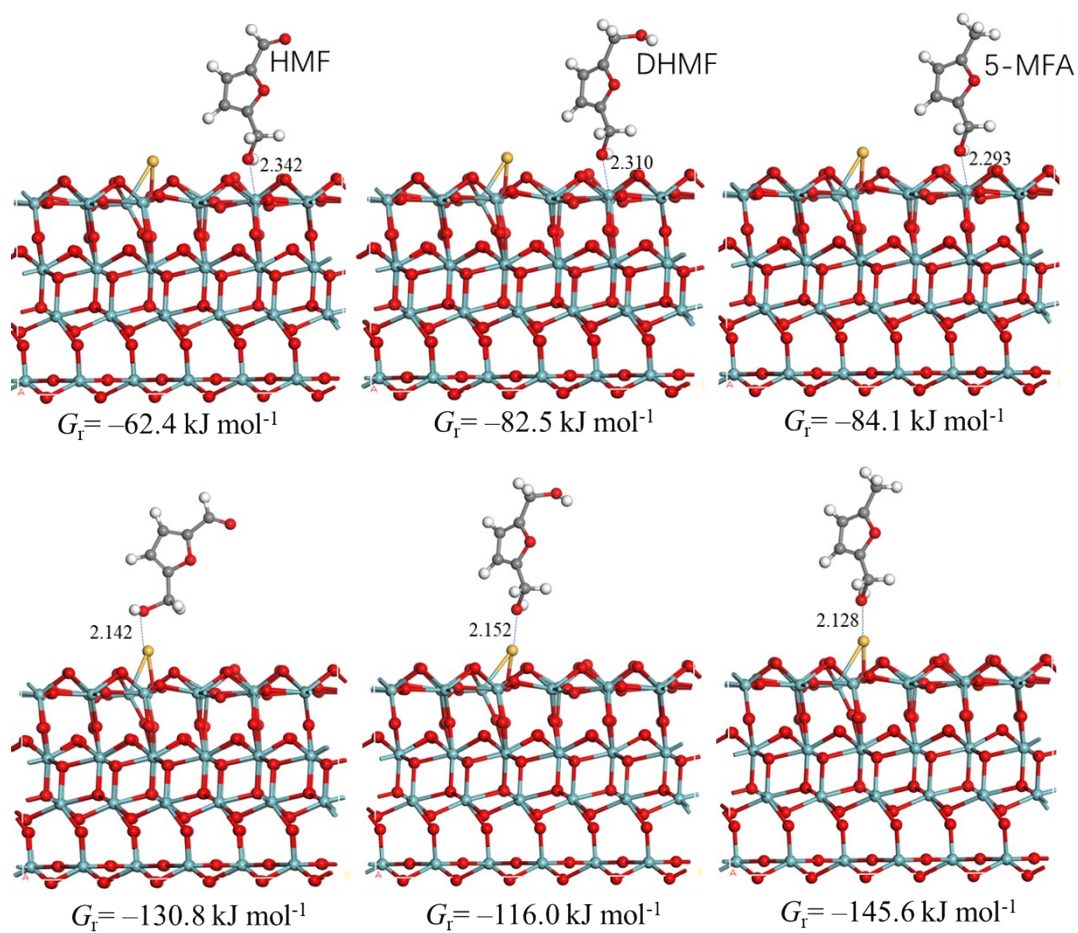

Fig. S5. The adsorption modes for HMF, DHMF, and 5-MFA over Nb-site of  $\text{Pt}_1/\text{Nb}_2\text{O}_5\text{-OV}$  (upper row) and over Pt-site of  $\text{Pt}_1/\text{Nb}_2\text{O}_5\text{-OV}$  (bottom row), respectively, Bond lengths are reported in Å. The relative Gibbs free energies ( $G_r$ ,  $\text{kJ mol}^{-1}$ ) are shown.

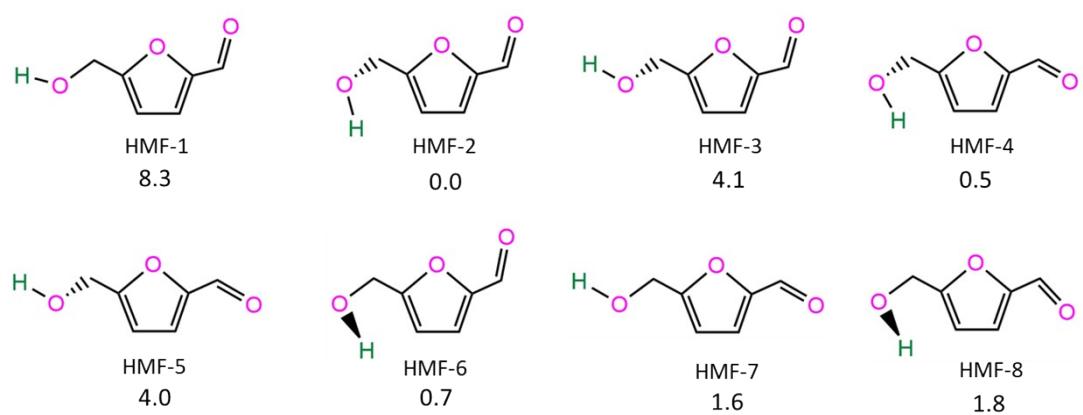

**Fig. S6.** The geometric structures and the relative Gibbs free energy ( $G_r$ , kJ mol<sup>-1</sup>) relative to HMF-2 for eighth conformers of HMF in THF solution at the G4 level. For clarity, hydrogen atoms on carbon are not shown. Bond lengths are reported in Å.

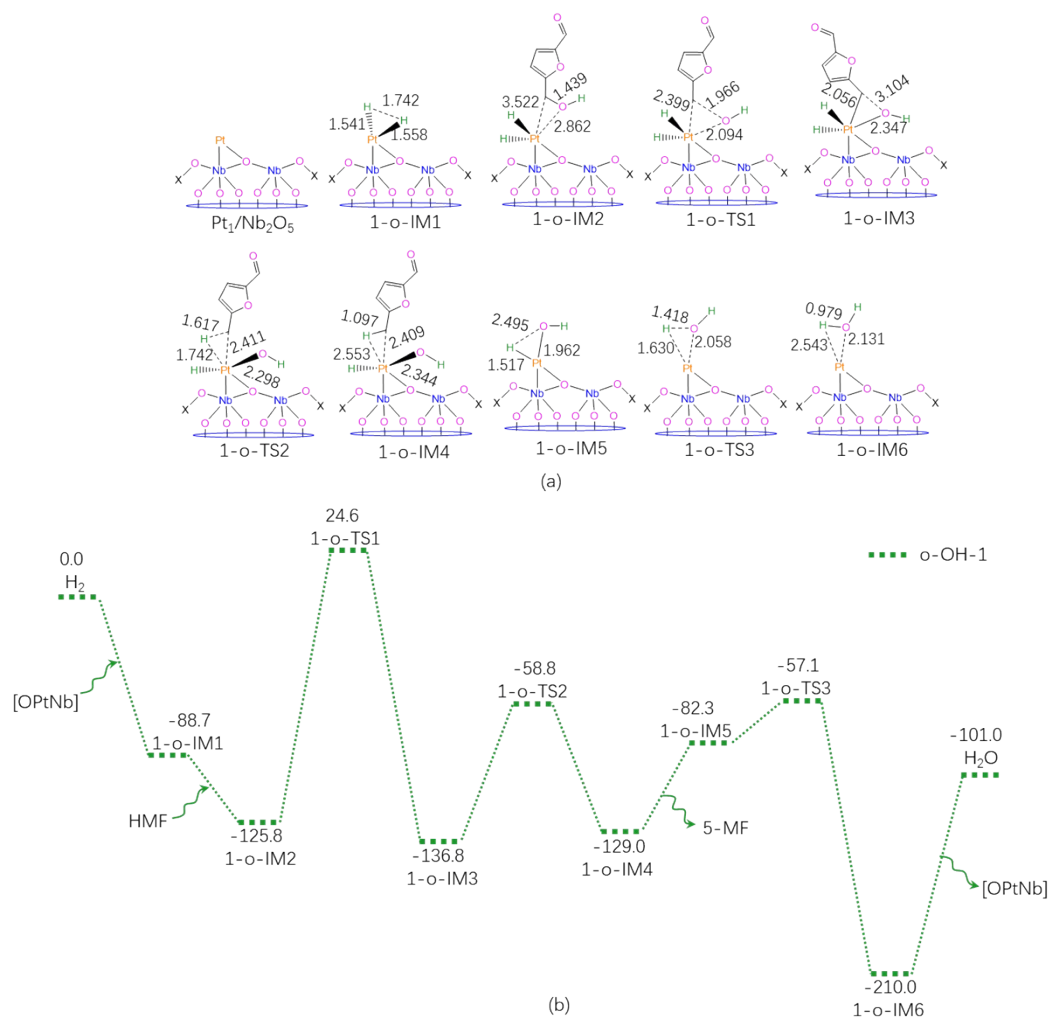

**Fi**

**g. S7.** The optimized geometric structures (a) and the schematic energy diagrams (b) with the Gibbs free energy ( $G_r$ , kJ mol<sup>-1</sup>) relative to the reactants for catalytic hydrogenolysis of HMF to 5-MF over [OPtNb]. Bond lengths are reported in Å.

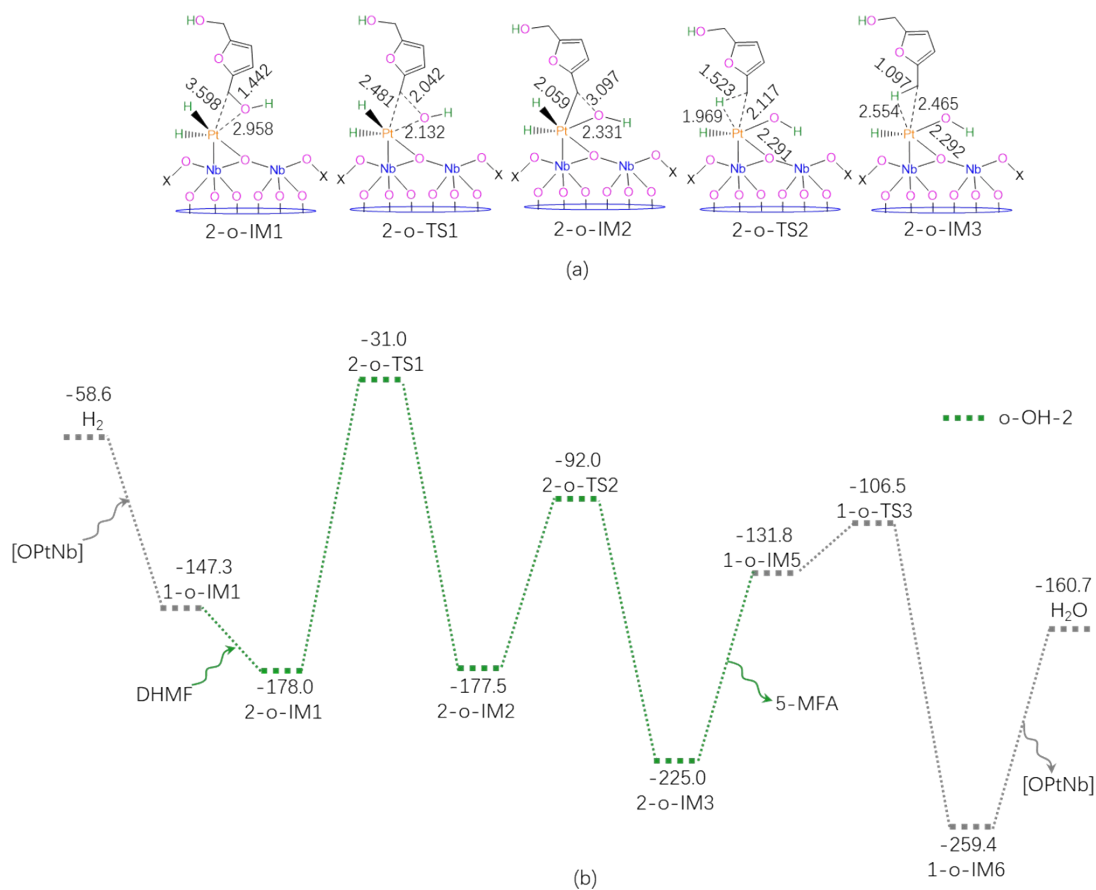

**Fig. S8.** The optimized geometric structures (a) and the schematic energy diagrams (b) with the Gibbs free energy ( $G_r$ , kJ mol<sup>-1</sup>) relative to the reactants for catalytic hydrogenolysis of DHMF to 5-MFA over [OPtNb]. Bond lengths are reported in Å.



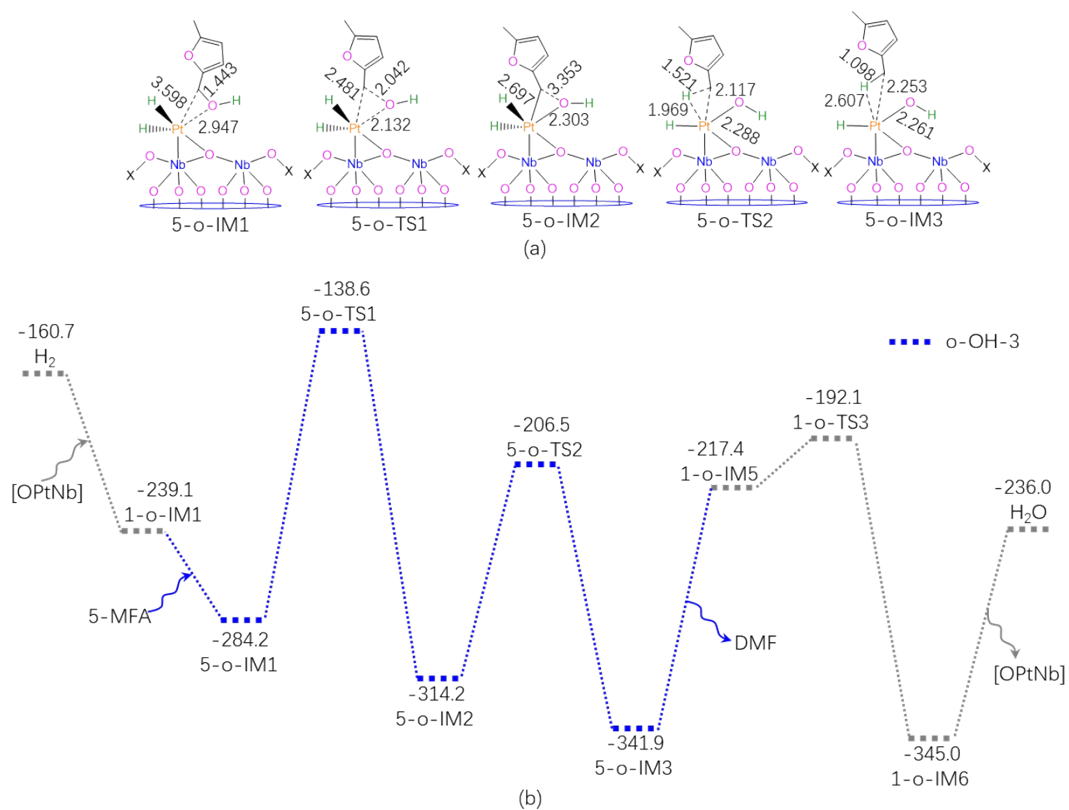

**Fig. S9.** The optimized geometric structures (a) and the schematic energy diagrams (b) with the Gibbs free energy ( $G_r$ , kJ mol<sup>-1</sup>) relative to the reactants for catalytic hydrogenolysis of 5-MFA to DMF over [OPtNb]. Bond lengths are reported in Å.



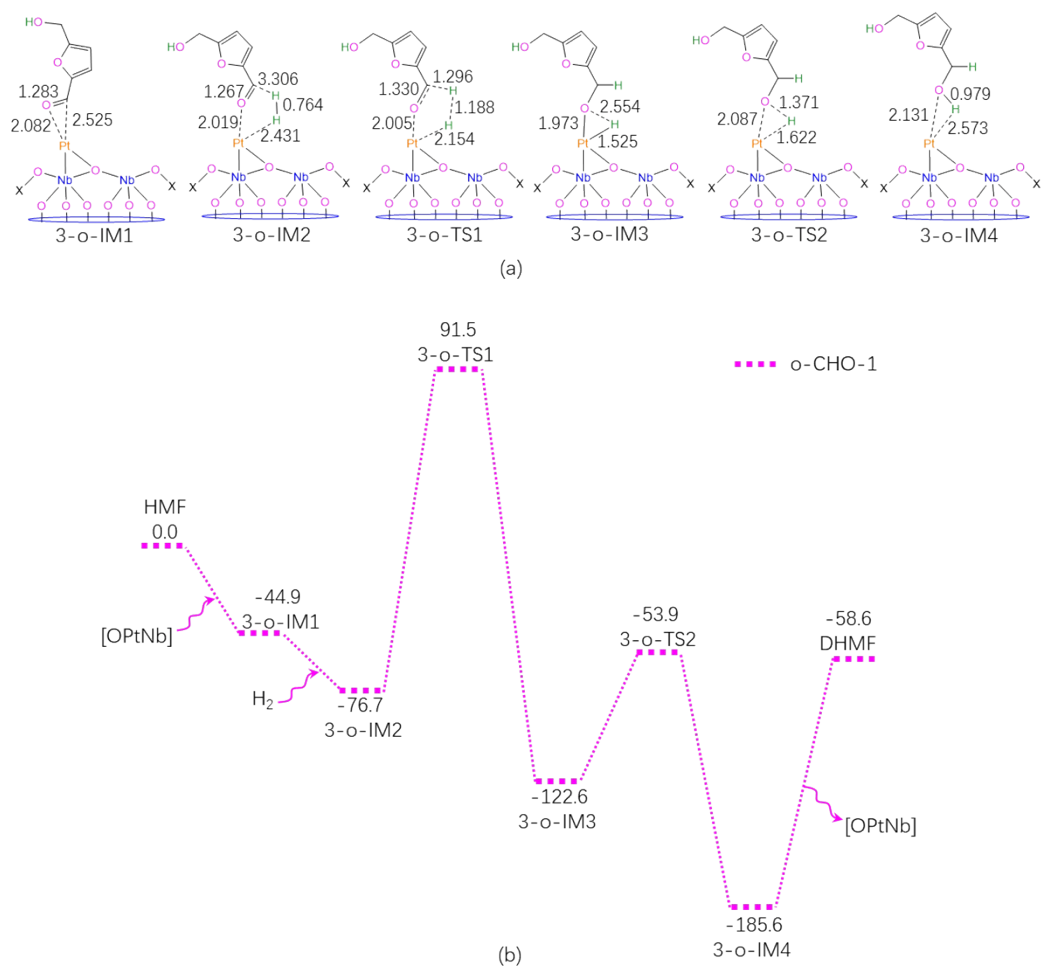

**Fig. S10.** The optimized geometric structures (a) and the schematic energy diagrams (b) with the Gibbs free energy ( $G_r$ , kJ mol<sup>-1</sup>) relative to the reactants for catalytic hydrogenation of HMF to DHMF over [OPtNb]. Bond lengths are reported in Å.

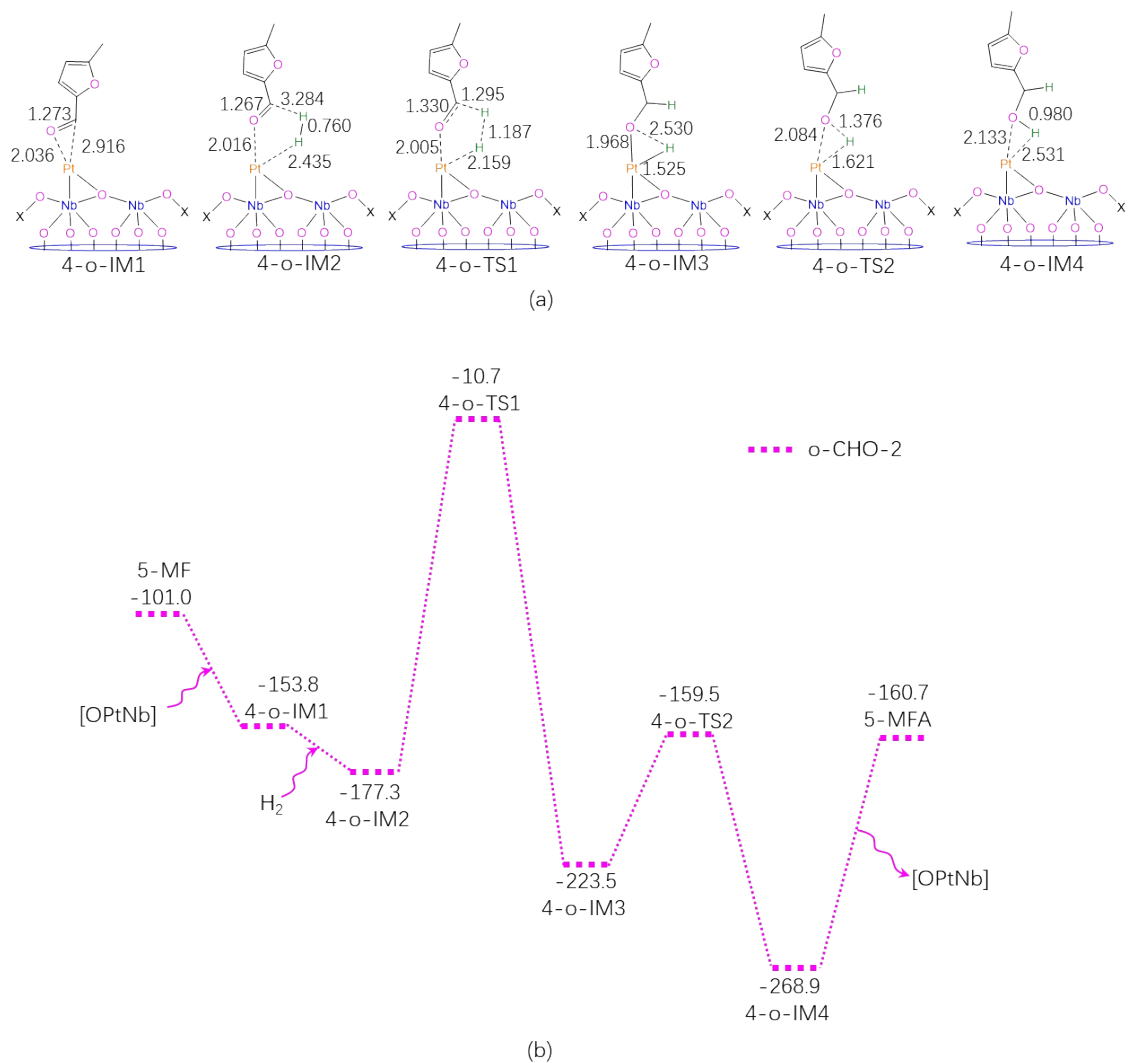

**Fig. S11.** The optimized geometric structures (a) and the schematic energy diagrams (b) with the Gibbs free energy ( $G_r$ , kJ mol<sup>-1</sup>) relative to the reactants for catalytic hydrogenation of 5-MF to MFA over [OPtNb]. Bond lengths are reported in Å.

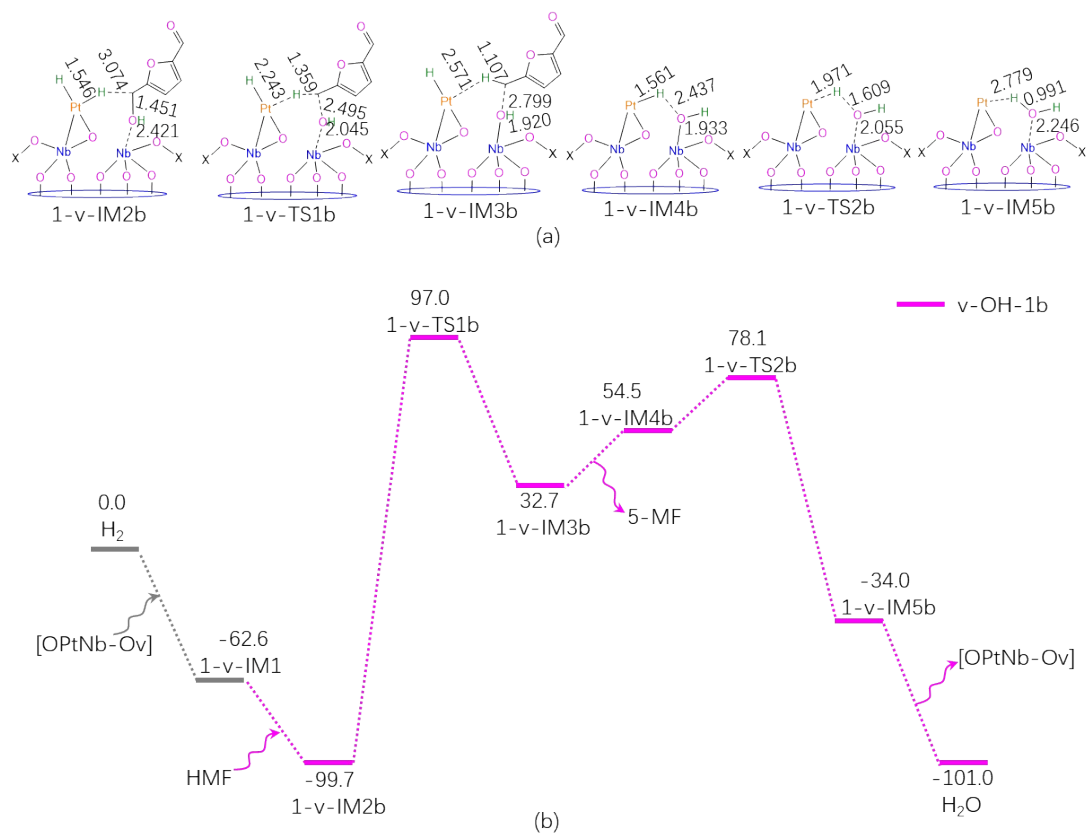

**Fig. S12.** The optimized geometric structures (a) and the schematic energy diagrams (b) with the Gibbs free energy ( $G_r$ , kJ mol<sup>-1</sup>) relative to the reactants for catalytic hydrogenolysis of HMF to 5-MF over [OPtNb-Ov]. Bond lengths are reported in Å.

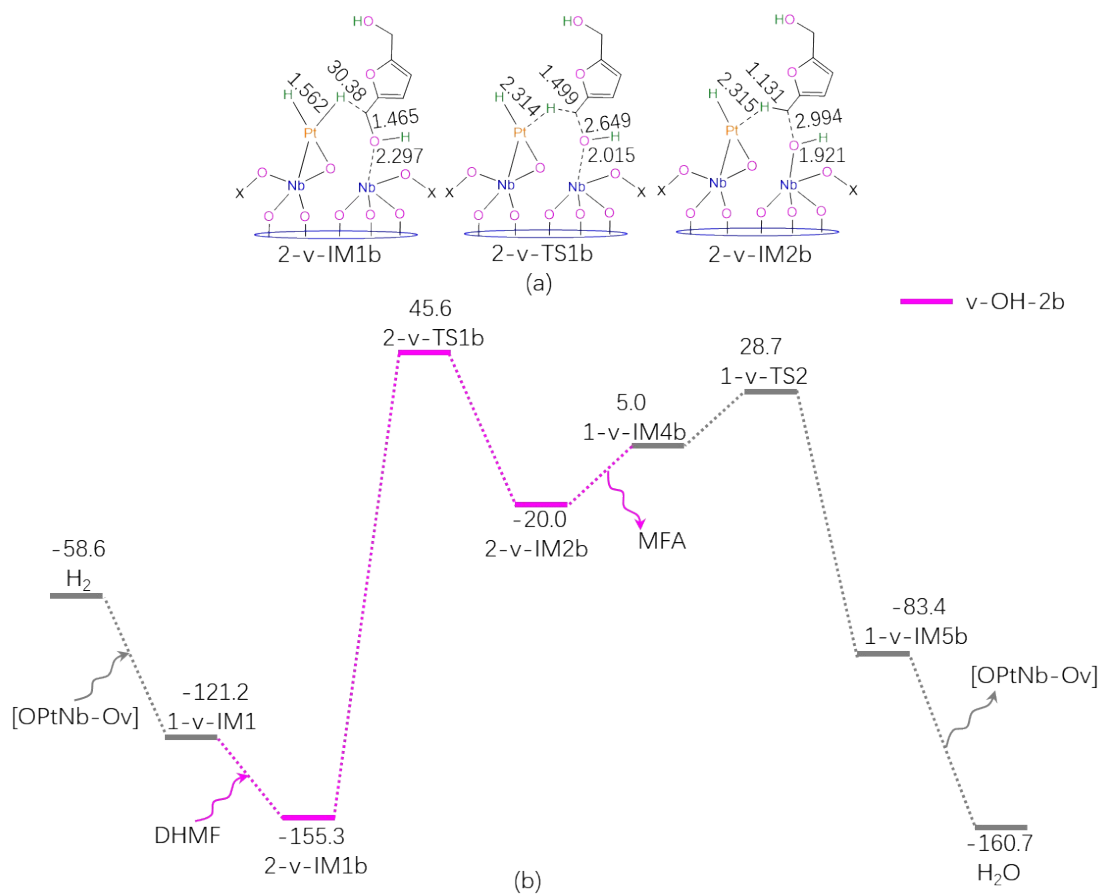

**Fig. S13.** The optimized geometric structures (a) and the schematic energy diagrams (b) with the Gibbs free energy ( $G_r$ , kJ mol<sup>-1</sup>) relative to the reactants for catalytic hydrogenolysis of DHMF to 5-MFA over [OPtNb-Ov]. Bond lengths are reported in Å.

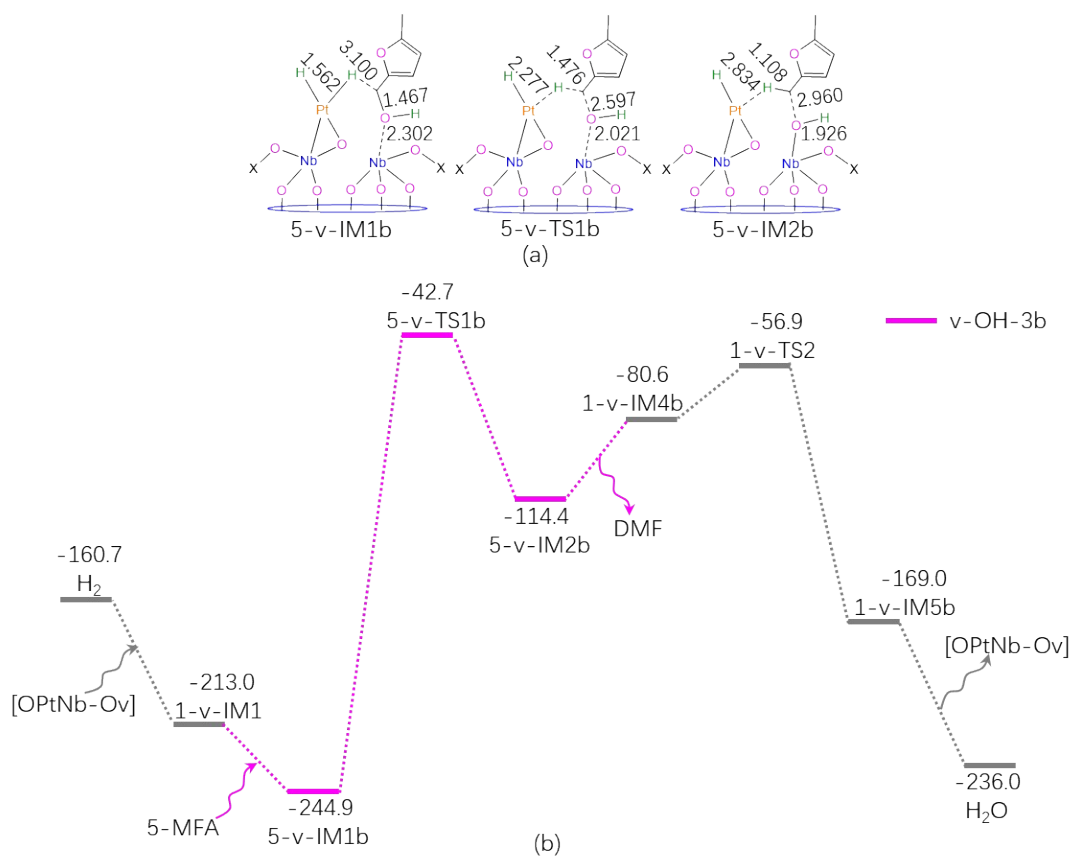

**Fig. S14.** The optimized geometric structures (a) and the schematic energy diagrams (b) with the Gibbs free energy ( $G_r$ , kJ mol<sup>-1</sup>) relative to the reactants for catalytic hydrogenolysis of 5-MFA to DMF over [OPtNb-Ov]. Bond lengths are reported in Å.

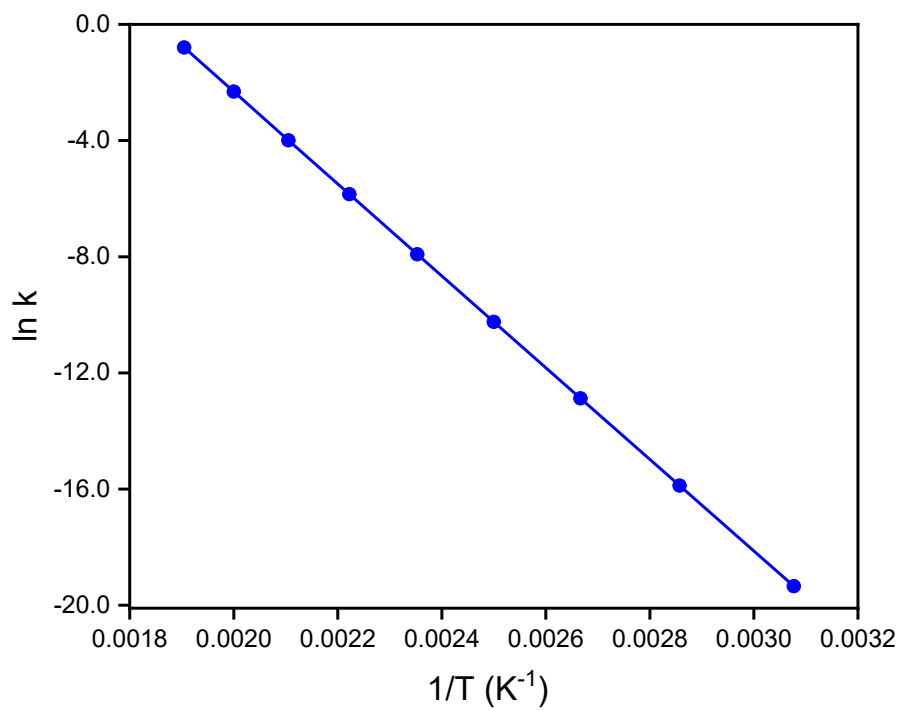

$$k_{\text{o-OH-1}} = 1.09 \times 10^{12} \exp(-142693 / RT)$$

**Fig. S15.** Arrhenius plots of rate constants for the crucial reaction step of 1-o-IM2 → 1-o-TS1 in the reaction of HMF-to-5-MF hydrogenolysis catalyzed by Pt<sub>1</sub>/Nb<sub>2</sub>O<sub>5</sub> in THF solution.

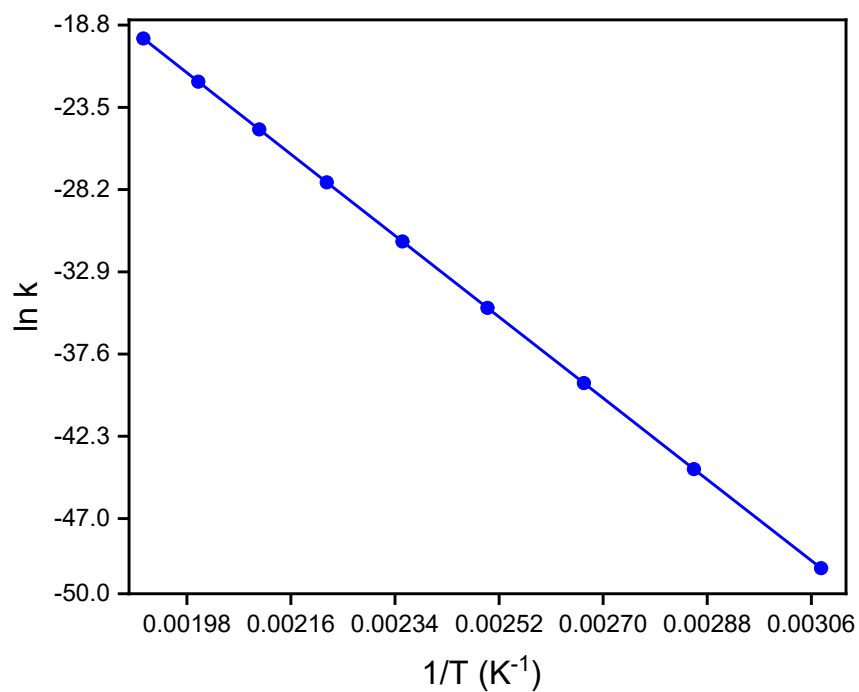

$$k_{\text{o-CHO-1}} = 7.29 \times 10^{12} \exp(-214742 / RT)$$

**Fig. S16.** Arrhenius plots of rate constants for the crucial reaction step of 3-o-IM4 → 3-o-TS1(before) in the reaction of HMF-to-DHMF hydrogenation catalyzed by Pt<sub>1</sub>/Nb<sub>2</sub>O<sub>5</sub> in THF solution.

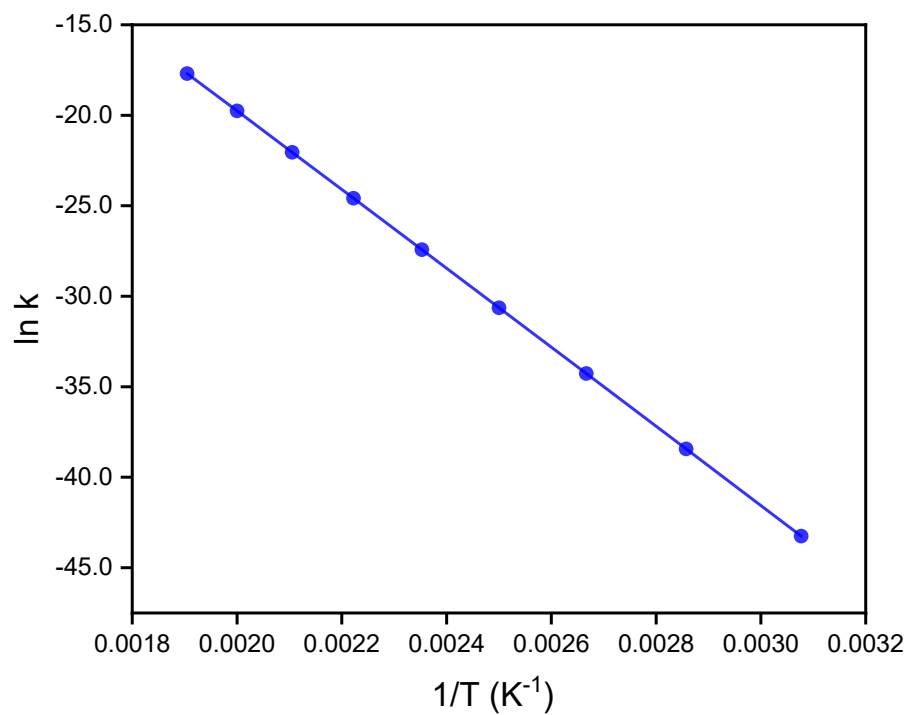

$$k_{o-6/7} = 1.31 \times 10^{12} \exp(-189518 / RT)$$

**Fig. S17.** Arrhenius plots of rate constants for the crucial reaction step of 1-o-IM6 + H<sub>2</sub> + 5-MF → 4-o-TS1 + H<sub>2</sub>O in the reaction of HMF-to-DMF hydrogenation catalyzed by Pt<sub>1</sub>/Nb<sub>2</sub>O<sub>5</sub> in THF solution.



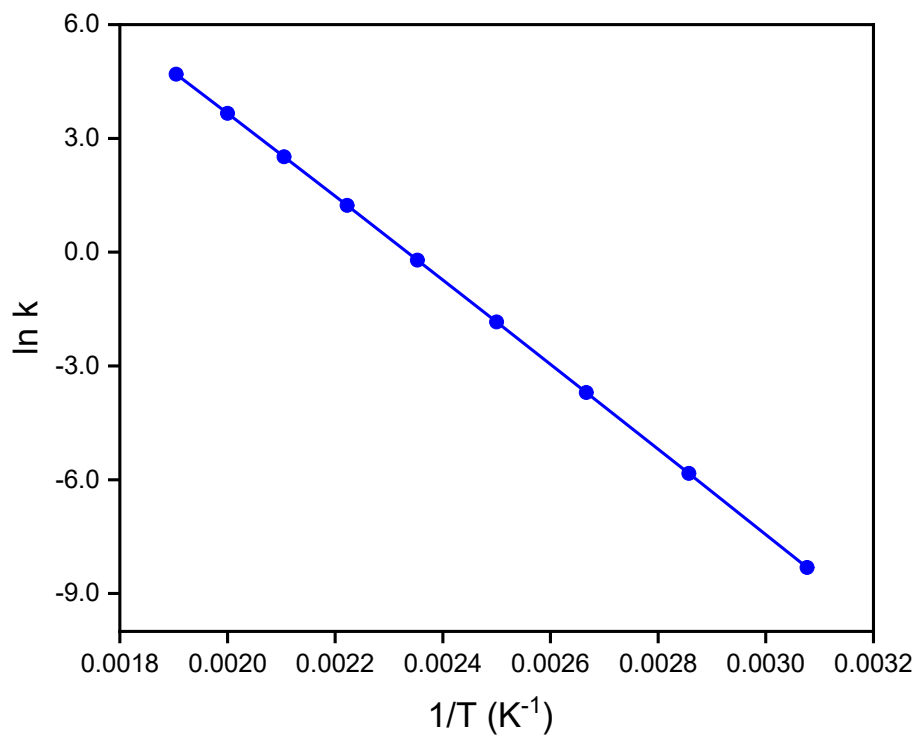

$$k_{v\text{-OH-1}} = 1.72 \times 10^{11} \exp(-92252 / RT)$$

**Fig. S18.** Arrhenius plots of rate constants for the crucial reaction step of 1-v-IM4 → 1-v-TS1 (before) in the reaction of HMF-to-5-MF hydrogenolysis catalyzed by Pt<sub>1</sub>/Nb<sub>2</sub>O<sub>5</sub>-Ov in THF solution.

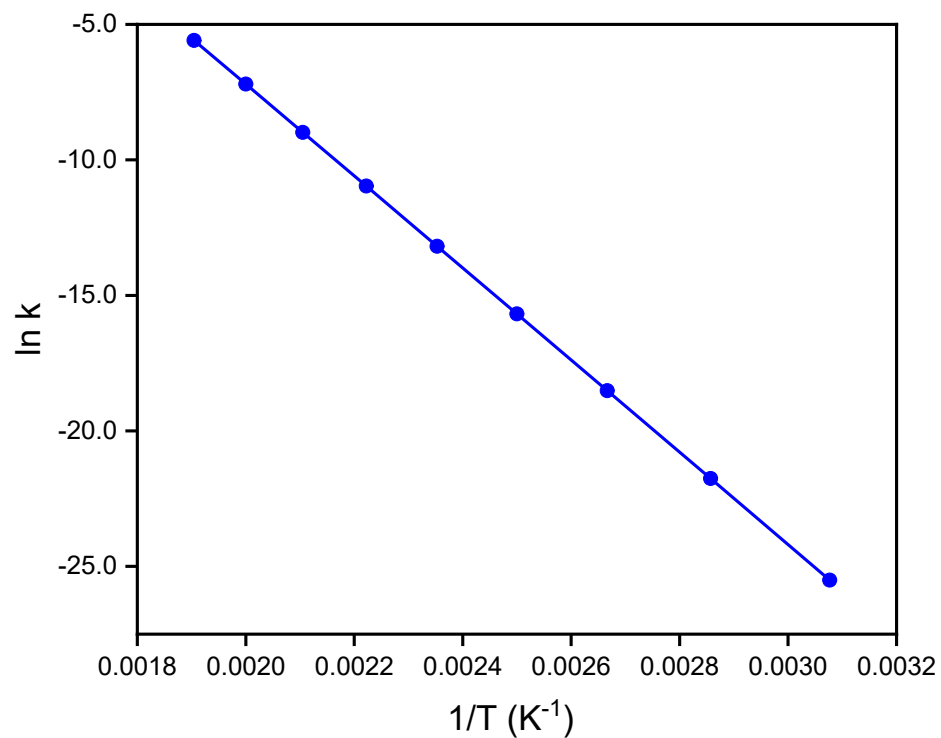

$$k_{v\text{-CHO-1}} = 4.25 \times 10^{11} \exp(-141229 / RT)$$

**Fig. S19.** Arrhenius plots of rate constants for the crucial reaction step of 3-v-IM2 → 3-v-TS1 in the reaction of HMF-to-DHMF hydrogenation catalyzed by Pt<sub>1</sub>/Nb<sub>2</sub>O<sub>5</sub>-Ov in THF solution.

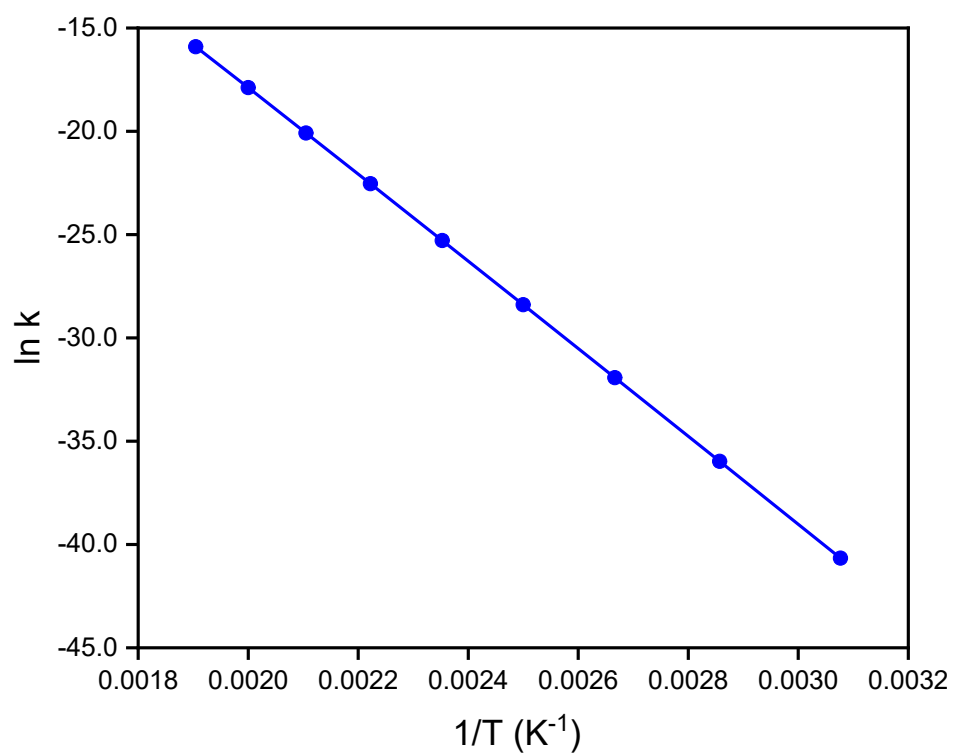

$$k_{v-6/7} = 3.85 \times 10^{10} \exp(-175608 / RT)$$

**Fig. S20.** Arrhenius plots of rate constants for the crucial reaction step of 1-v-IM4 + H<sub>2</sub> → 4-v-TS1 + H<sub>2</sub>O in the reaction of HMF-to-DMF hydrogenation catalyzed by Pt<sub>1</sub>/Nb<sub>2</sub>O<sub>5</sub>-Ov in THF solution.

**Table S1.** Over the 325 ~ 525 K temperature range, the rate constant ratios of  $k_{v-OH-1}/k_{v-CHO-1}$ ,  $k_{v-OH-1}/k_{v-6/7}$ ,  $k_{o-OH-1}/k_{o-CHO-1}$ ,  $k_{v-OH-1}/k_{o-OH-1}$ , and  $k_{v-CHO-1}/k_{o-CHO-1}$ , as a function of temperature  $T$ .

| T/K | $k_{v-OH-1}/k_{v-CHO-1}$ | $k_{v-OH-1}/k_{v-6/7}$ | $k_{o-OH-1}/k_{o-CHO-1}$ | $k_{v-OH-1}/k_{o-OH-1}$ | $k_{v-CHO-1}/k_{o-CHO-1}$ | <sup>a</sup> $S_{v-OH-1}$ |
|-----|--------------------------|------------------------|--------------------------|-------------------------|---------------------------|---------------------------|
| 325 | $3.01 \times 10^7$       | $1.12 \times 10^{14}$  | $5.69 \times 10^{10}$    | $2.02 \times 10^7$      | $3.81 \times 10^{10}$     | 100.00%                   |
| 350 | $8.26 \times 10^6$       | $1.23 \times 10^{13}$  | $8.47 \times 10^9$       | $5.32 \times 10^6$      | $5.46 \times 10^9$        | 100.00%                   |
| 375 | $2.69 \times 10^6$       | $1.83 \times 10^{12}$  | $1.63 \times 10^9$       | $1.68 \times 10^6$      | $1.01 \times 10^9$        | 100.00%                   |
| 400 | $1.01 \times 10^6$       | $3.43 \times 10^{11}$  | $3.83 \times 10^8$       | $6.10 \times 10^5$      | $2.32 \times 10^8$        | 100.00%                   |
| 425 | $4.24 \times 10^5$       | $7.86 \times 10^{10}$  | $1.07 \times 10^8$       | $2.50 \times 10^5$      | $6.33 \times 10^7$        | 100.00%                   |
| 450 | $1.96 \times 10^5$       | $2.12 \times 10^{10}$  | $3.45 \times 10^7$       | $1.13 \times 10^5$      | $1.99 \times 10^7$        | 100.00%                   |
| 475 | $9.85 \times 10^4$       | $6.56 \times 10^9$     | $1.25 \times 10^7$       | $5.56 \times 10^4$      | $7.08 \times 10^6$        | 100.00%                   |
| 500 | $5.30 \times 10^4$       | $2.28 \times 10^9$     | $5.03 \times 10^6$       | $2.94 \times 10^4$      | $2.79 \times 10^6$        | 100.00%                   |
| 525 | $3.02 \times 10^4$       | $8.79 \times 10^8$     | $2.21 \times 10^6$       | $1.65 \times 10^4$      | $1.20 \times 10^6$        | 100.00%                   |

Notes:

$S_{v-OH-1}$  represents the selectivity of the hydrogenolysis of HMF-to-5-MF, catalyzed by Pt<sub>1</sub>/Nb<sub>2</sub>O<sub>5</sub>-Ov.

$$^a S_{v-OH-1} = \frac{k_{v-OH-1}}{k_{v-OH-1} + k_{v-CHO-1}} \times 100\%$$

**Table S2.** Zero-point vibrational energies (*ZPVE*, hartree), sum of electronic energies in the gas phase ( $E_{t, g}$ , hartree), thermal correction to Gibbs free energies ( $G_0$ , hartree), sum of electronic energies in aqueous solution ( $E_{t, l}$ , hartree), sum of electronic and thermal Gibbs free energies ( $G_c$ , hartree) and relative Gibbs free energies ( $G_{r, l}$ , kJ mol<sup>-1</sup>) of various species with respect to the reactants for the reaction of HMF-to-5-MF over Pt<sub>1</sub>/Nb<sub>2</sub>O<sub>5</sub>.

| Species                                         | <i>ZPVE</i> | $E_{t, g}$  | $G_0$   | $E_{t, l}$   | $G_c$        | $G_{r, l}$ |
|-------------------------------------------------|-------------|-------------|---------|--------------|--------------|------------|
| Pt <sub>1</sub> /Nb <sub>2</sub> O <sub>5</sub> | 0.13282     | -1428.02665 | 0.04171 | -19700.54552 | -19700.50381 |            |
| H <sub>2</sub>                                  | 0.01026     | -1.16417    | 0.00885 | -1.16444     | -1.15559     |            |
| HMF                                             | 0.10966     | -457.54293  | 0.09384 | -457.55733   | -457.46349   |            |
| H <sub>2</sub> O                                | 0.02089     | -76.37869   | 0.02089 | -76.38734    | -76.36645    |            |
| DHMF                                            | 0.13286     | -458.74163  | 0.11343 | -458.75485   | -458.64141   |            |
| 5-MF                                            | 0.10505     | -382.37249  | 0.09172 | -382.38281   | -382.29108   |            |
| MFA                                             | 0.12845     | -383.56738  | 0.11075 | -383.57626   | -383.46551   |            |
| DMF                                             | 0.12311     | -308.39298  | 0.11028 | -308.39752   | -308.28724   |            |
| [OPtNb]<br>+ H <sub>2</sub> + HMF               | 0.25086     | -1886.74011 | 0.12125 | -20159.27913 | -20159.15787 | 0.0        |
| 1-o-IM1                                         | 0.14717     | -1429.27272 | 0.05569 | -19701.78384 | -19701.72815 |            |
| 1-o-IM1 + HMF                                   | 0.25683     | -1886.81566 | 0.14953 | -20159.34117 | -20159.19164 | -88.7      |
| 1-o-IM2                                         | 0.25792     | -1886.82083 | 0.14217 | -20159.34797 | -20159.20580 | -125.8     |
| 1-o-TS1                                         | 0.25573     | -1886.76801 | 0.14333 | -20159.29182 | -20159.14850 | 24.6       |
| 1-o-IM3                                         | 0.26029     | -1886.84552 | 0.14872 | -20159.35871 | -20159.20999 | -136.8     |
| 1-o-TS2                                         | 0.25507     | -1886.80117 | 0.14271 | -20159.32297 | -20159.18026 | -58.8      |
| 1-o-IM4                                         | 0.25703     | -1886.81558 | 0.14435 | -20159.35135 | -20159.20700 | -129.0     |
| 1-o-IM5                                         | 0.15297     | -1504.45521 | 0.05969 | -19776.95783 | -19776.89814 |            |
| 1-o-IM5 + 5-MF                                  | 0.25802     | -1886.82771 | 0.15141 | -20159.34063 | -20159.18923 | -82.3      |
| 1-o-TS3                                         | 0.15073     | -1504.43680 | 0.05772 | -19776.94624 | -19776.88852 |            |
| 1-o-TS3 + 5-MF                                  | 0.25579     | -1886.80929 | 0.14944 | -20159.32905 | -20159.17960 | -57.1      |
| 1-o-IM6                                         | 0.15677     | -1504.46024 | 0.06088 | -19777.00763 | -19776.94675 |            |
| 1-o-IM6 + 5-MF                                  | 0.26182     | -1886.83273 | 0.15260 | -20159.39043 | -20159.23784 | -210.0     |

**Table S3.** Zero-point vibrational energies (*ZPVE*, hartree), sum of electronic energies in the gas phase ( $E_{t, g}$ , hartree), thermal correction to Gibbs free energies ( $G_0$ , hartree), sum of electronic energies in aqueous solution ( $E_{t, l}$ , hartree), sum of electronic and thermal Gibbs free energies ( $G_c$ , hartree) and relative Gibbs free energies ( $G_{r, l}$ , kJ mol<sup>-1</sup>) of various species with respect to the reactants for the reaction of DHMF-to-5-MFA over Pt<sub>1</sub>/N<sub>2</sub>O<sub>5</sub>.

| Species                             | <i>ZPVE</i> | $E_{t, g}$  | $G_0$   | $E_{t, l}$   | $G_c$        | $G_{r, l}$ |
|-------------------------------------|-------------|-------------|---------|--------------|--------------|------------|
| 1-o-IM1                             | 0.14717     | -1429.27272 | 0.05569 | -19701.78384 | -19701.72815 |            |
| 1-o-IM1<br>+ DHMF - H <sub>2</sub>  | 0.26977     | -1886.85019 | 0.16027 | -20159.37425 | -20159.21398 | -147.3     |
| 2-o-IM1                             | 0.28054     | -1888.02013 | 0.17249 | -20160.55374 | -20160.38125 |            |
| 2-o-IM1 - H <sub>2</sub>            | 0.27028     | -1886.85596 | 0.16364 | -20159.38930 | -20159.22566 | -178.0     |
| 2-o-TS1                             | 0.27846     | -1887.96855 | 0.18280 | -20160.50806 | -20160.32526 |            |
| 2-o-TS1 - H <sub>2</sub>            | 0.26820     | -1886.80438 | 0.17395 | -20159.34362 | -20159.16967 | -31.0      |
| 2-o-IM2                             | 0.28103     | -1888.04840 | 0.17144 | -20160.55252 | -20160.38107 |            |
| 2-o-IM2 - H <sub>2</sub>            | 0.27076     | -1886.88423 | 0.16259 | -20159.38808 | -20159.22548 | -177.5     |
| 2-o-TS2                             | 0.27843     | -1887.99467 | 0.16823 | -20160.51674 | -20160.34850 |            |
| 2-o-TS2 - H <sub>2</sub>            | 0.26817     | -1886.83050 | 0.15938 | -20159.35229 | -20159.19291 | -92.0      |
| 2-o-IM3                             | 0.28304     | -1888.03733 | 0.16507 | -20160.56424 | -20160.39917 |            |
| 2-o-IM3 - H <sub>2</sub>            | 0.27278     | -1886.87316 | 0.15622 | -20159.39980 | -20159.24358 | -225.0     |
| 1-o-IM5                             | 0.15297     | -1504.45521 | 0.05969 | -19776.95783 | -19776.89814 |            |
| 1-o-IM5 - H <sub>2</sub><br>+ 5-MFA | 0.27116     | -1886.85842 | 0.16159 | -20159.36965 | -20159.20806 | -131.8     |
| 1-o-TS3                             | 0.15073     | -1504.43680 | 0.05772 | -19776.94624 | -19776.88852 |            |
| 1-o-TS3 - H <sub>2</sub><br>+ 5-MFA | 0.26892     | -1886.84001 | 0.15962 | -20159.35806 | -20159.19844 | -106.5     |
| 1-o-IM6                             | 0.15677     | -1504.46024 | 0.06088 | -19777.00763 | -19776.94675 |            |
| 1-o-IM6 - H <sub>2</sub><br>+ 5-MFA | 0.27496     | -1886.86345 | 0.16278 | -20159.41945 | -20159.25667 | -259.4     |

**Table S4.** Zero-point vibrational energies (*ZPVE*, hartree), sum of electronic energies in the gas phase ( $E_{t, g}$ , hartree), thermal correction to Gibbs free energies ( $G_0$ , hartree), sum of electronic energies in aqueous solution ( $E_{t, l}$ , hartree), sum of electronic and thermal Gibbs free energies ( $G_c$ , hartree) and relative Gibbs free energies ( $G_{r, l}$ , kJ mol<sup>-1</sup>) of various species with respect to the reactants for the reaction of 5-MFA-to-DMF over Pt<sub>1</sub>/N<sub>2</sub>O<sub>5</sub>.

| Species                                               | <i>ZPVE</i> | $E_{t, g}$  | $G_0$   | $E_{t, l}$   | $G_c$        | $G_{r, l}$ |
|-------------------------------------------------------|-------------|-------------|---------|--------------|--------------|------------|
| 1-o-IM1                                               | 0.14717     | -1429.27272 | 0.05569 | -19701.78384 | -19701.72815 |            |
| 1-o-IM1 + MFA<br>- 2H <sub>2</sub> + H <sub>2</sub> O | 0.27598     | -1886.89046 | 0.16962 | -20159.41855 | -20159.24893 | -239.1     |
| 5-o-IM1                                               | 0.27506     | -1812.84456 | 0.16854 | -20085.37937 | -20085.21083 |            |
| 5-o-IM1 - 2H <sub>2</sub><br>+ H <sub>2</sub> O       | 0.27543     | -1886.89492 | 0.17173 | -20159.43783 | -20159.26610 | -284.2     |
| 5-o-TS1                                               | 0.27305     | -1812.79530 | 0.18065 | -20085.33603 | -20085.15539 |            |
| 5-o-TS1 - 2H <sub>2</sub><br>+ H <sub>2</sub> O       | 0.27342     | -1886.84565 | 0.18383 | -20159.39449 | -20159.21066 | -138.6     |
| 5-o-IM2                                               | 0.27653     | -1812.87061 | 0.16778 | -20085.39008 | -20085.22229 |            |
| 5-o-IM2 - 2H <sub>2</sub><br>+ H <sub>2</sub> O       | 0.27690     | -1886.92096 | 0.17097 | -20159.44853 | -20159.27756 | -314.2     |
| 5-o-TS2                                               | 0.27359     | -1812.81994 | 0.16228 | -20085.34352 | -20085.18124 |            |
| 5-o-TS2 - 2H <sub>2</sub><br>+ H <sub>2</sub> O       | 0.27396     | -1886.87029 | 0.16547 | -20159.40197 | -20159.23650 | -206.5     |
| 5-o-IM3                                               | 0.27829     | -1812.86787 | 0.16474 | -20085.39756 | -20085.23282 |            |
| 5-o-IM3 - 2H <sub>2</sub><br>+ H <sub>2</sub> O       | 0.27866     | -1886.91822 | 0.16793 | -20159.45601 | -20159.28808 | -341.9     |
| 1-o-IM5                                               | 0.15297     | -1504.45521 | 0.05969 | -19776.95783 | -19776.89814 |            |
| 1-o-IM5 - 2H <sub>2</sub><br>+ H <sub>2</sub> O + DMF | 0.27645     | -1886.89854 | 0.17315 | -20159.41381 | -20159.24065 | -217.4     |
| 1-o-TS3                                               | 0.15073     | -1504.43680 | 0.05772 | -19776.94624 | -19776.88852 |            |
| 1-o-TS3 - 2H <sub>2</sub><br>+ H <sub>2</sub> O + DMF | 0.27421     | -1886.88013 | 0.17119 | -20159.40222 | -20159.23103 | -192.1     |
| 1-o-IM6                                               | 0.15677     | -1504.46024 | 0.06088 | -19777.00763 | -19776.94675 |            |
| 1-o-IM6 - 2H <sub>2</sub><br>+ H <sub>2</sub> O + DMF | 0.28025     | -1886.90357 | 0.17434 | -20159.46361 | -20159.28926 | -345.0     |

**Table S5.** Zero-point vibrational energies (*ZPVE*, hartree), sum of electronic energies in the gas phase ( $E_{t, g}$ , hartree), thermal correction to Gibbs free energies ( $G_0$ , hartree), sum of electronic energies in aqueous solution ( $E_{t, l}$ , hartree), sum of electronic and thermal Gibbs free energies ( $G_c$ , hartree) and relative Gibbs free energies ( $G_{r, l}$ , kJ/mol) of various species with respect to the reactants for the reaction of HMF-to-DHMF over Pt<sub>1</sub>/N<sub>2</sub>O<sub>5</sub>.

| Species                  | <i>ZPVE</i> | $E_{t, g}$  | $G_0$   | $E_{t, l}$   | $G_c$        | $G_{r, l}$ |
|--------------------------|-------------|-------------|---------|--------------|--------------|------------|
| 3-o-IM1                  | 0.24283     | -1885.60945 | 0.14391 | -20158.16332 | -20158.01940 |            |
| 3-o-IM1 + H <sub>2</sub> | 0.25310     | -1886.77362 | 0.15277 | -20159.32776 | -20159.17499 | -44.9      |
| 3-o-IM2                  | 0.25449     | -1886.79198 | 0.12720 | -20159.31429 | -20159.18708 | -76.7      |
| 3-o-TS1                  | 0.25435     | -1886.73793 | 0.14096 | -20159.26397 | -20159.12301 | 91.5       |
| 3-o-IM3                  | 0.26276     | -1886.81990 | 0.15027 | -20159.35483 | -20159.20456 | -122.6     |
| 3-o-TS2                  | 0.25964     | -1886.78632 | 0.14759 | -20159.32599 | -20159.17840 | -53.9      |
| 3-o-IM4                  | 0.26570     | -1886.81137 | 0.14999 | -20159.37856 | -20159.22857 | -185.6     |



**Table S6.** Zero-point vibrational energies (*ZPVE*, hartree), sum of electronic energies in the gas phase ( $E_{t, g}$ , hartree), thermal correction to Gibbs free energies ( $G_0$ , hartree), sum of electronic energies in aqueous solution ( $E_{t, l}$ , hartree), sum of electronic and thermal Gibbs free energies ( $G_c$ , hartree) and relative Gibbs free energies ( $G_{r, l}$ , kJ mol<sup>-1</sup>) of various species with respect to the reactants for the reaction of 5-MF-to-5-MFA over Pt<sub>1</sub>/N<sub>2</sub>O<sub>5</sub>.

| Species                    | <i>ZPVE</i> | $E_{t, g}$  | $G_0$   | $E_{t, l}$   | $G_c$        | $G_{r, l}$ |
|----------------------------|-------------|-------------|---------|--------------|--------------|------------|
| 4-o-IM1                    | 0.23838     | -1810.44885 | 0.12315 | -20082.97315 | -20082.85000 |            |
| 4-o-IM1 + H <sub>2</sub> O | 0.25927     | -1886.82754 | 0.14404 | -20159.36048 | -20159.21644 | -153.8     |
| 4-o-IM2                    | 0.25004     | -1811.62109 | 0.12772 | -20084.14228 | -20084.01456 |            |
| 4-o-IM2 + H <sub>2</sub> O | 0.26067     | -1886.83561 | 0.13975 | -20159.36517 | -20159.22542 | -177.3     |
| - H <sub>2</sub>           |             |             |         |              |              |            |
| 4-o-TS1                    | 0.24967     | -1811.56505 | 0.14030 | -20084.09138 | -20083.95107 |            |
| 4-o-TS1 + H <sub>2</sub> O | 0.26030     | -1886.77957 | 0.15234 | -20159.31427 | -20159.16193 | -10.7      |
| - H <sub>2</sub>           |             |             |         |              |              |            |
| 4-o-IM3                    | 0.25912     | -1811.64596 | 0.14972 | -20084.18186 | -20084.03215 |            |
| 4-o-IM3 + H <sub>2</sub> O | 0.26975     | -1886.86049 | 0.16175 | -20159.40476 | -20159.24301 | -223.5     |
| - H <sub>2</sub>           |             |             |         |              |              |            |
| 4-o-TS2                    | 0.25568     | -1811.61347 | 0.14365 | -20084.15139 | -20084.00775 |            |
| 4-o-TS2 + H <sub>2</sub> O | 0.26631     | -1886.82800 | 0.15568 | -20159.37429 | -20159.21861 | -159.5     |
| - H <sub>2</sub>           |             |             |         |              |              |            |
| 4-o-IM4                    | 0.26114     | -1811.64516 | 0.14333 | -20084.19275 | -20084.04942 |            |
| 4-o-IM4 + H <sub>2</sub> O | 0.27177     | -1886.85969 | 0.15537 | -20159.41565 | -20159.26028 | -268.9     |
| - H <sub>2</sub>           |             |             |         |              |              |            |

**Table S7.** Zero-point vibrational energies (*ZPVE*, hartree), sum of electronic energies in the gas phase ( $E_{t, g}$ , hartree), thermal correction to Gibbs free energies ( $G_0$ , hartree), sum of electronic energies in aqueous solution ( $E_{t, l}$ , hartree), sum of electronic and thermal Gibbs free energies ( $G_c$ , hartree) and relative Gibbs free energies ( $G_{r, l}$ , kJ mol<sup>-1</sup>) of various species with respect to the reactants for the reaction of HMF-to-5-MF over Pt<sub>1</sub>/Nb<sub>2</sub>O<sub>5</sub>-Ov.

| Species                                             | <i>ZPVE</i> | $E_{t, g}$  | $G_0$   | $E_{t, l}$   | $G_c$        | $G_{r, l}$ |
|-----------------------------------------------------|-------------|-------------|---------|--------------|--------------|------------|
| Pt <sub>1</sub> /Nb <sub>2</sub> O <sub>5</sub> -Ov | 0.23998     | -1810.96430 | 0.11932 | -20084.18067 | -20084.06135 | 0.0        |
| 1-v-IM1                                             | 0.13710     | -1353.48996 | 0.04777 | -19626.66946 | -19626.62169 |            |
| 1-v-IM1 + HMF                                       | 0.24677     | -1811.03289 | 0.14161 | -20084.22679 | -20084.08517 | -62.6      |
| 1-v-IM2                                             | 0.24991     | -1811.04142 | 0.13783 | -20084.23334 | -20084.09551 | -89.7      |
| 1-v-TS1                                             | 0.24696     | -1810.98391 | 0.13594 | -20084.19400 | -20084.05806 | 8.6        |
| 1-v-IM3                                             | 0.24656     | -1811.02943 | 0.13655 | -20084.20813 | -20084.07158 | -26.9      |
| 1-v-TS2                                             | 0.24373     | -1811.01351 | 0.13477 | -20084.20316 | -20084.06840 | -18.5      |
| 1-v-IM4                                             | 0.24931     | -1811.07206 | 0.13911 | -20084.27606 | -20084.13695 | -198.5     |
| 1-v-IM5                                             | 0.22396     | -1734.66715 | 0.11374 | -20007.86176 | -20007.74802 |            |
| 1-v-IM5 + H <sub>2</sub> O                          | 0.24486     | -1811.04584 | 0.13462 | -20084.24910 | -20084.11447 | -139.5     |
| 1-v-TS3                                             | 0.22254     | -1734.64661 | 0.11333 | -20007.84750 | -20007.73417 |            |
| 1-v-TS3 + H <sub>2</sub> O                          | 0.24344     | -1811.02530 | 0.13422 | -20084.23484 | -20084.10062 | -103.1     |
| 1-v-IM6                                             | 0.22654     | -1734.63159 | 0.09796 | -20007.83556 | -20007.73760 |            |
| 1-v-IM6 + H <sub>2</sub> O                          | 0.24743     | -1811.01028 | 0.11885 | -20084.22290 | -20084.10405 | -112.1     |

**Table S8.** Zero-point vibrational energies (*ZPVE*, hartree), sum of electronic energies in the gas phase ( $E_{t, g}$ , hartree), thermal correction to Gibbs free energies ( $G_0$ , hartree), sum of electronic energies in aqueous solution ( $E_{t, l}$ , hartree), sum of electronic and thermal Gibbs free energies ( $G_c$ , hartree) and relative Gibbs free energies ( $G_{r, l}$ , kJ mol<sup>-1</sup>) of various species with respect to the reactants for the reaction of DHMF-to-5-MFA over Pt<sub>1</sub>/N<sub>2</sub>O<sub>5</sub>-Ov.

| Species                                        | <i>ZPVE</i> | $E_{t, g}$  | $G_0$   | $E_{t, l}$   | $G_c$        | $G_{r, l}$ |
|------------------------------------------------|-------------|-------------|---------|--------------|--------------|------------|
| 1-v-IM1                                        | 0.13710     | -1353.48996 | 0.04777 | -19626.66946 | -19626.62169 |            |
| 1-v-IM1+<br>DHMF - H <sub>2</sub>              | 0.25970     | -1811.06743 | 0.15235 | -20084.25986 | -20084.10751 | -121.2     |
| 2-v-IM1                                        | 0.27221     | -1812.24062 | 0.17053 | -20085.43976 | -20085.26922 |            |
| 2-v-IM1 - H <sub>2</sub>                       | 0.26194     | -1811.07645 | 0.16168 | -20084.27531 | -20084.11363 | -137.3     |
| 2-v-TS1                                        | 0.27035     | -1812.20044 | 0.16310 | -20085.39707 | -20085.23397 |            |
| 2-v-TS1 - H <sub>2</sub>                       | 0.26009     | -1811.03628 | 0.15424 | -20084.23263 | -20084.07838 | -44.7      |
| 2-v-IM2                                        | 0.26970     | -1812.22648 | 0.15542 | -20085.41689 | -20085.26148 |            |
| 2-v-IM2 - H <sub>2</sub>                       | 0.25943     | -1811.06232 | 0.14656 | -20084.25245 | -20084.10589 | -116.9     |
| 2-v-TS2                                        | 0.26633     | -1812.20389 | 0.15303 | -20085.40207 | -20085.24904 |            |
| 2-v-TS2 - H <sub>2</sub>                       | 0.25607     | -1811.03972 | 0.14418 | -20084.23763 | -20084.09345 | -84.3      |
| 2-v-IM3                                        | 0.27136     | -1812.26755 | 0.14664 | -20085.45933 | -20085.31269 |            |
| 2-v-IM3 - H <sub>2</sub>                       | 0.26110     | -1811.10338 | 0.13779 | -20084.29489 | -20084.15710 | -251.4     |
| 2-v-IM4                                        | 0.24657     | -1735.85981 | 0.13609 | -20009.06346 | -20008.92737 |            |
| 2-v-IM4 - H <sub>2</sub><br>+ H <sub>2</sub> O | 0.25720     | -1811.07433 | 0.14812 | -20084.28635 | -20084.13823 | -201.8     |
| 2-v-TS3                                        | 0.24502     | -1735.84192 | 0.14311 | -20009.05560 | -20008.91250 |            |
| 2-v-TS3 - H <sub>2</sub><br>+ H <sub>2</sub> O | 0.25565     | -1811.05644 | 0.15514 | -20084.27850 | -20084.12335 | -162.8     |
| 2-v-IM5                                        | 0.24894     | -1735.82748 | 0.11840 | -20009.03775 | -20008.91934 |            |
| 2-v-IM5 - H <sub>2</sub><br>+ H <sub>2</sub> O | 0.25957     | -1811.04200 | 0.13044 | -20084.26054 | -20084.13020 | -180.8     |

**Table S9.** Zero-point vibrational energies (*ZPVE*, hartree), sum of electronic energies in the gas phase ( $E_{t, g}$ , hartree), thermal correction to Gibbs free energies ( $G_0$ , hartree), sum of electronic energies in aqueous solution ( $E_{t, l}$ , hartree), sum of electronic and thermal Gibbs free energies ( $G_c$ , hartree) and relative Gibbs free energies ( $G_{r, l}$ , kJ mol<sup>-1</sup>) of various species with respect to the reactants for the reaction of 5-MFA-to-DMF over Pt<sub>1</sub>/N<sub>2</sub>O<sub>5</sub>-Ov.

| Species                                               | <i>ZPVE</i> | $E_{t, g}$  | $G_0$   | $E_{t, l}$   | $G_c$        | $G_{r, l}$ |
|-------------------------------------------------------|-------------|-------------|---------|--------------|--------------|------------|
| 1-v-IM1                                               | 0.13710     | -1353.48996 | 0.04777 | -19626.66946 | -19626.62169 |            |
| 1-v-IM1 + MFA<br>- 2H <sub>2</sub> + H <sub>2</sub> O | 0.26592     | -1811.10769 | 0.16171 | -20084.30417 | -20084.14246 | -213.0     |
| 5-v-IM1                                               | 0.26786     | -1737.06550 | 0.16308 | -20010.26165 | -20010.09857 |            |
| 5-v-IM1 - 2H <sub>2</sub><br>+ H <sub>2</sub> O       | 0.26822     | -1811.11585 | 0.16627 | -20084.32010 | -20084.15383 | -242.8     |
| 5-v-TS1                                               | 0.26352     | -1737.00802 | 0.14025 | -20010.20472 | -20010.06447 |            |
| 5-v-TS1 - 2H <sub>2</sub><br>+ H <sub>2</sub> O       | 0.26389     | -1811.05838 | 0.14343 | -20084.26317 | -20084.11974 | -153.3     |
| 5-v-IM2                                               | 0.26504     | -1737.06214 | 0.15689 | -20010.24015 | -20010.08326 |            |
| 5-v-IM2 - 2H <sub>2</sub><br>+ H <sub>2</sub> O       | 0.26540     | -1811.11249 | 0.16008 | -20084.29860 | -20084.13853 | -202.6     |
| 5-v-TS2                                               | 0.26211     | -1737.03566 | 0.16227 | -20010.23449 | -20010.07223 |            |
| 5-v-TS2 - 2H <sub>2</sub><br>+ H <sub>2</sub> O       | 0.26247     | -1811.08602 | 0.16545 | -20084.29295 | -20084.12750 | -173.7     |
| 5-v-IM3                                               | 0.26708     | -1737.09194 | 0.15746 | -20010.29991 | -20010.14245 |            |
| 5-v-IM3 - 2H <sub>2</sub><br>+ H <sub>2</sub> O       | 0.26744     | -1811.14230 | 0.16064 | -20084.35836 | -20084.19772 | -358.0     |
| 5-v-IM4                                               | 0.24109     | -1660.68036 | 0.13346 | -19933.87855 | -19933.74510 |            |
| 5-v-IM4 - 2H <sub>2</sub><br>+ 2H <sub>2</sub> O      | 0.26234     | -1811.10940 | 0.15753 | -20084.32434 | -20084.16682 | -276.9     |
| 5-v-TS3                                               | 0.24061     | -1660.66094 | 0.13840 | -19933.87314 | -19933.73474 |            |
| 5-v-TS3 - 2H <sub>2</sub><br>+ 2H <sub>2</sub> O      | 0.26186     | -1811.08998 | 0.16247 | -20084.31893 | -20084.15646 | -249.7     |
| 5-v-IM5                                               | 0.24441     | -1660.65716 | 0.12977 | -19933.86685 | -19933.73708 |            |
| 5-v-IM5 - 2H <sub>2</sub><br>+ 2H <sub>2</sub> O      | 0.26566     | -1811.08620 | 0.15384 | -20084.31264 | -20084.15880 | -255.9     |

**Table S10.** Zero-point vibrational energies (*ZPVE*, hartree), sum of electronic energies in the gas phase ( $E_{t, g}$ , hartree), thermal correction to Gibbs free energies ( $G_0$ , hartree), sum of electronic energies in aqueous solution ( $E_{t, 1}$ , hartree), sum of electronic and thermal Gibbs free energies ( $G_c$ , hartree) and relative Gibbs free energies ( $G_{r, 1}$ , kJ mol<sup>-1</sup>) of various species with respect to the reactants for the reaction of HMF-to-DHMF over Pt<sub>1</sub>/N<sub>2</sub>O<sub>3</sub>-Ov.

| Species                  | <i>ZPVE</i> | $E_{t, g}$  | $G_0$   | $E_{t, 1}$   | $G_c$        | $G_{r, 1}$ |
|--------------------------|-------------|-------------|---------|--------------|--------------|------------|
| 3-v-IM1                  | 0.23209     | -1809.84329 | 0.11863 | -20083.04042 | -20082.92179 |            |
| 3-v-IM1 + H <sub>2</sub> | 0.24235     | -1811.00745 | 0.12748 | -20084.20486 | -20084.07738 | -42.1      |
| 3-v-IM2                  | 0.24584     | -1811.01400 | 0.13276 | -20084.21468 | -20084.08192 | -54.0      |
| 3-v-TS1                  | 0.24155     | -1810.95068 | 0.13302 | -20084.15652 | -20084.02349 | 99.4       |
| 3-v-IM3                  | 0.25112     | -1811.02937 | 0.13891 | -20084.22636 | -20084.08745 | -68.5      |
| 3-v-TS2                  | 0.25107     | -1811.00885 | 0.14334 | -20084.20369 | -20084.06035 | 2.6        |
| 3-v-IM4                  | 0.25580     | -1811.03453 | 0.14606 | -20084.24276 | -20084.09671 | -92.8      |

**Table S11.** Zero-point vibrational energies (*ZPVE*, hartree), sum of electronic energies in the gas phase ( $E_{t, g}$ , hartree), thermal correction to Gibbs free energies ( $G_0$ , hartree), sum of electronic energies in aqueous solution ( $E_{t, l}$ , hartree), sum of electronic and thermal Gibbs free energies ( $G_c$ , hartree) and relative Gibbs free energies ( $G_{r, l}$ ,  $\text{kJ mol}^{-1}$ ) of various species with respect to the reactants for the reaction of 5-MF-to-5-MFA over  $\text{Pt}_1/\text{N}_2\text{O}_5\text{-Ov}$ .

| Species                    | <i>ZPVE</i> | $E_{t, g}$  | $G_0$   | $E_{t, l}$   | $G_c$        | $G_{r, l}$ |
|----------------------------|-------------|-------------|---------|--------------|--------------|------------|
| 4-v-IM1                    | 0.22749     | -1734.66938 | 0.11909 | -20007.86522 | -20007.74613 |            |
| 4-v-IM1 + H <sub>2</sub> O | 0.24838     | -1811.04807 | 0.13998 | -20084.25256 | -20084.11258 | -134.5     |
| 4-v-IM2                    | 0.24019     | -1735.84043 | 0.13165 | -20009.03840 | -20008.90675 |            |
| 4-v-IM2 + H <sub>2</sub> O | 0.25082     | -1811.05495 | 0.14369 | -20084.26129 | -20084.11760 | -147.7     |
| - H <sub>2</sub>           |             |             |         |              |              |            |
| 4-v-TS1                    | 0.23934     | -1735.78709 | 0.13210 | -20008.98376 | -20008.85165 |            |
| 4-v-TS1 + H <sub>2</sub> O | 0.24997     | -1811.00162 | 0.14414 | -20084.20665 | -20084.06251 | -3.1       |
| - H <sub>2</sub>           |             |             |         |              |              |            |
| 4-v-IM3                    | 0.24716     | -1735.85665 | 0.13974 | -20009.04529 | -20008.90555 |            |
| 4-v-IM3 + H <sub>2</sub> O | 0.25779     | -1811.07117 | 0.15178 | -20084.26818 | -20084.11640 | -144.5     |
| - H <sub>2</sub>           |             |             |         |              |              |            |
| 4-v-TS2                    | 0.24501     | -1735.83663 | 0.13836 | -20009.02952 | -20008.89116 |            |
| 4-v-TS2 + H <sub>2</sub> O | 0.25564     | -1811.05115 | 0.15039 | -20084.25241 | -20084.10202 | -106.8     |
| - H <sub>2</sub>           |             |             |         |              |              |            |
| 4-v-IM4                    | 0.25075     | -1735.86105 | 0.14596 | -20009.07080 | -20008.92483 |            |
| 4-v-IM4 + H <sub>2</sub> O | 0.26138     | -1811.07557 | 0.15800 | -20084.29369 | -20084.13569 | -195.2     |
| - H <sub>2</sub>           |             |             |         |              |              |            |
